# Supplementary material for: Facile immobilization of PNNNP-Pd pincer complexes in MFU-4l-OH and the effects of guest loading on Lewis acid catalytic activity
Source: Royal Society of Chemistry journal article supplement (doi:10.1039/d2dt03781e), 2023-01-01
Supplement: d2dt03781e1.pdf [file d2dt03781e1.pdf]

## Supporting Information

### Facile immobilization of P<sup>N</sup>N<sup>N</sup>P-Pd pincer complexes in MFU-4l-OH and the effects of guest loading on Lewis acid catalytic activity

Jordon S. Hilliard and Casey R. Wade\*

*Department of Chemistry and Biochemistry, The Ohio State University, Columbus, Ohio 43210, United States*

\*E-mail: [wade.521@osu.edu](mailto:wade.521@osu.edu)

#### Table of Contents:

|                                                                                                                                                                                                                                                         |            |
|---------------------------------------------------------------------------------------------------------------------------------------------------------------------------------------------------------------------------------------------------------|------------|
| <b>Figure S1.</b> PXRD patterns of <b>Pdl-x</b> .....                                                                                                                                                                                                   | <b>S3</b>  |
| <b>Figure S2.</b> Acid-digested <sup>1</sup> H NMR spectrum (CF <sub>3</sub> CO <sub>2</sub> H/DMSO-d <sub>6</sub> ) of <b>Pdl-0.06</b> .....                                                                                                           | <b>S3</b>  |
| <b>Figure S3.</b> Acid-digested <sup>1</sup> H NMR spectrum (CF <sub>3</sub> CO <sub>2</sub> H/DMSO-d <sub>6</sub> ) of <b>Pdl-0.10</b> .....                                                                                                           | <b>S4</b>  |
| <b>Figure S4.</b> Acid-digested <sup>1</sup> H NMR spectrum (CF <sub>3</sub> CO <sub>2</sub> H/DMSO-d <sub>6</sub> ) of <b>Pdl-0.18</b> .....                                                                                                           | <b>S4</b>  |
| <b>Figure S5.</b> Acid-digested <sup>1</sup> H NMR spectrum (CF <sub>3</sub> CO <sub>2</sub> H/DMSO-d <sub>6</sub> ) of <b>Pdl-0.40</b> .....                                                                                                           | <b>S5</b>  |
| <b>Figure S6.</b> Acid-digested <sup>1</sup> H NMR spectrum (CF <sub>3</sub> CO <sub>2</sub> H/ DMSO-d <sub>6</sub> ) of <b>Pdl-0.50</b> .....                                                                                                          | <b>S5</b>  |
| <b>Figure S7.</b> Acid-digested <sup>31</sup> P{ <sup>1</sup> H} NMR spectrum (CF <sub>3</sub> CO <sub>2</sub> H/DMSO-d <sub>6</sub> ) of <b>Pdl-x</b> .....                                                                                            | <b>S6</b>  |
| <b>Figure S8.</b> Quantification of H <sub>3</sub> (P <sup>N</sup> N <sup>N</sup> P-Pdl) incorporated at various loadings.....                                                                                                                          | <b>S6</b>  |
| <b>Figure S9.</b> Alternating pore structure of MFU-4l-OH showing the Type A (~12 Å, red) and Type B (~18 Å, cyan) pores. ....                                                                                                                          | <b>S7</b>  |
| <b>Figure S10.</b> XRF spectra of <b>Pdl-x</b> .....                                                                                                                                                                                                    | <b>S7</b>  |
| <b>Figure S11.</b> DFT differential pore volume plots for MFU-4l-OH, <b>Pdl-0.06</b> , <b>Pdl-0.16</b> , and <b>Pdl-0.40</b> calculated using the infinite slit adsorption model with 2D-non-local density functional theory molecular references ..... | <b>S8</b>  |
| <b>Figure S12.</b> Measured bond distances in MFU-4l-OH (a) and H <sub>3</sub> -PdI-P <sup>N</sup> N <sup>N</sup> P considering rotations about the carboxylic acids (b) .....                                                                          | <b>S8</b>  |
| <b>Figure S13.</b> XRF spectra of <b>PdBF<sub>4</sub>-x</b> .....                                                                                                                                                                                       | <b>S9</b>  |
| <b>Figure S14.</b> Acid-digested <sup>31</sup> P{ <sup>1</sup> H} NMR spectrum (CF <sub>3</sub> CO <sub>2</sub> H/DMSO-d <sub>6</sub> ) of <b>PdBF<sub>4</sub>-0.40</b> .....                                                                           | <b>S9</b>  |
| <b>Figure S15.</b> Acid digested <sup>1</sup> H NMR spectrum (CF <sub>3</sub> CO <sub>2</sub> H/DMSO-d <sub>6</sub> ) of <b>PdBF<sub>4</sub>-0.06</b> .....                                                                                             | <b>S10</b> |
| <b>Figure S16.</b> Acid digested <sup>1</sup> H NMR spectrum (CF <sub>3</sub> CO <sub>2</sub> H/DMSO-d <sub>6</sub> ) of <b>PdBF<sub>4</sub>-0.10</b> .....                                                                                             | <b>S10</b> |
| <b>Figure S17.</b> Acid digested <sup>1</sup> H NMR spectrum (CF <sub>3</sub> CO <sub>2</sub> H/DMSO-d <sub>6</sub> ) of <b>PdBF<sub>4</sub>-0.18</b> .....                                                                                             | <b>S11</b> |
| <b>Figure S18.</b> Acid digested <sup>1</sup> H NMR spectrum (CF <sub>3</sub> CO <sub>2</sub> H/DMSO-d <sub>6</sub> ) of <b>PdBF<sub>4</sub>-0.40</b> .....                                                                                             | <b>S11</b> |
| <b>Figure S19.</b> PXRD patterns of <b>PdBF<sub>4</sub>-x</b> .....                                                                                                                                                                                     | <b>S12</b> |
| <b>Figure S20.</b> Experimental data collected for the cyclization of citronellal (100 mM) with <b>PdBF<sub>4</sub>-x</b> (0.5 mol % Pd) .....                                                                                                          | <b>S12</b> |
| <b>Figure S21.</b> GC-FID trace of the carbonyl-ene cyclization of citronellal with <b>PdBF<sub>4</sub>-0.06</b> (0.5 mol % Pd) .....                                                                                                                   | <b>S13</b> |

|                                                                                                                                                                                                                                                                                 |            |
|---------------------------------------------------------------------------------------------------------------------------------------------------------------------------------------------------------------------------------------------------------------------------------|------------|
| <b>Figure S22.</b> GC-FID trace of the carbonyl-ene cyclization of citronellal with <b>PdBF<sub>4</sub>-0.10</b> (0.5 mol % Pd)                                                                                                                                                 | <b>S14</b> |
| <b>Figure S23.</b> GC-FID trace of the carbonyl-ene cyclization of citronellal with <b>PdBF<sub>4</sub>-0.18</b> (0.5 mol % Pd)                                                                                                                                                 | <b>S15</b> |
| <b>Figure S24.</b> GC-FID trace of the carbonyl-ene cyclization of citronellal with <b>PdBF<sub>4</sub>-0.40</b> (0.5 mol % Pd)                                                                                                                                                 | <b>S16</b> |
| <b>Figure S25.</b> PXRD pattern of <b>PdBF<sub>4</sub>-0.06</b> after recyclability studies                                                                                                                                                                                     | <b>S16</b> |
| <b>Figure S26.</b> Acid digested <sup>1</sup> H NMR spectrum (CF <sub>3</sub> CO <sub>2</sub> H/DMSO-d <sub>6</sub> ) of <b>PdBF<sub>4</sub>-0.06</b> after catalysis                                                                                                           | <b>S17</b> |
| <b>Figure S27.</b> Experimental data collected for recycled catalyst during the cyclization of citronellal (100 mM) with <b>PdBF<sub>4</sub>-0.06</b>                                                                                                                           | <b>S17</b> |
| <b>Figure S28.</b> GC-FID traces of the recyclability studies for <b>PdBF<sub>4</sub>-0.06</b> (0.5 mol % Pd)                                                                                                                                                                   | <b>S18</b> |
| <b>Procedure for hot filtration test</b>                                                                                                                                                                                                                                        | <b>S19</b> |
| <b>Figure S29.</b> Experimental data collected during hot filtration test for the cyclization of citronellal (100 mM) with <b>PdBF<sub>4</sub>-0.18</b>                                                                                                                         | <b>S19</b> |
| <b>Figure S30.</b> Literature examples of heterogenous catalysts for the cyclization of citronellal considering overall productivity (mmol·g <sub>cat</sub> <sup>-1</sup> ·h <sup>-1</sup> )                                                                                    | <b>S20</b> |
| <b>Figure S31.</b> Experimental data collected during the cyclization of citronellal (100 mM) with <b>Ph<sub>4</sub>-P<sup>N</sup>N<sup>N</sup>P-PdBF<sub>4</sub></b> (0.5 mol % Pd) using single term exponential fits                                                         | <b>S20</b> |
| <b>Figure S32.</b> Experimental data collected during the cyclization of citronellal (100 mM) with <b>PdBF<sub>4</sub>-0.06</b> and <b>Ph<sub>4</sub>-P<sup>N</sup>N<sup>N</sup>P-PdBF<sub>4</sub></b> (0.5 mol % Pd)                                                           | <b>S21</b> |
| <b>Figure S33.</b> GC-FID trace of the carbonyl-ene cyclization of citronellal with <b>Ph<sub>4</sub>-P<sup>N</sup>N<sup>N</sup>P-PdBF<sub>4</sub></b> (0.5 mol % Pd)                                                                                                           | <b>S22</b> |
| <b>Figure S34.</b> Experimental data collected during the first time points for the cyclization of citronellal (100 mM) with the <b>PdBF<sub>4</sub>-x</b> series and the homogenous catalyst <b>Ph<sub>4</sub>-P<sup>N</sup>N<sup>N</sup>P-PdBF<sub>4</sub></b> (0.5 mol % Pd) | <b>S23</b> |
| <b>Figure S35.</b> <sup>1</sup> H NMR spectrum (DMSO-d <sub>6</sub> ) of [Ph <sub>4</sub> -P <sup>N</sup> N <sup>N</sup> P-PdCl]Cl                                                                                                                                              | <b>S23</b> |
| <b>Figure S36.</b> <sup>31</sup> P{ <sup>1</sup> H} NMR (DMSO-d <sub>6</sub> ) of [Ph <sub>4</sub> -P <sup>N</sup> N <sup>N</sup> P-PdCl]Cl                                                                                                                                     | <b>S24</b> |
| <b>Figure S37.</b> <sup>1</sup> H NMR spectrum (DMSO-d <sub>6</sub> ) of [Ph <sub>4</sub> -P <sup>N</sup> N <sup>N</sup> P-Pd]I                                                                                                                                                 | <b>S24</b> |
| <b>Figure S38.</b> <sup>31</sup> P{ <sup>1</sup> H} NMR spectrum (DMSO-d <sub>6</sub> ) of [Ph <sub>4</sub> -P <sup>N</sup> N <sup>N</sup> P-Pd]I                                                                                                                               | <b>S25</b> |
| <b>Figure S39.</b> <sup>13</sup> C{ <sup>1</sup> H} NMR spectrum (DMSO-d <sub>6</sub> ) of [Ph <sub>4</sub> -P <sup>N</sup> N <sup>N</sup> P-Pd]I                                                                                                                               | <b>S25</b> |
| <b>Figure S40.</b> <sup>1</sup> H NMR spectrum (CD <sub>3</sub> CN) of [Ph <sub>4</sub> -P <sup>N</sup> N <sup>N</sup> P-Pd(NCCH <sub>3</sub> )] <sub>2</sub> [BF <sub>4</sub> ] <sub>2</sub>                                                                                   | <b>S25</b> |
| <b>Figure S41.</b> <sup>31</sup> P{ <sup>1</sup> H} NMR spectrum (CD <sub>3</sub> CN) of [Ph <sub>4</sub> -P <sup>N</sup> N <sup>N</sup> P-Pd(NCCH <sub>3</sub> )] <sub>2</sub> [BF <sub>4</sub> ] <sub>2</sub>                                                                 | <b>S26</b> |
| <b>Figure S42.</b> <sup>1</sup> H – <sup>1</sup> H COSY spectrum (CD <sub>3</sub> CN) of [Ph <sub>4</sub> -P <sup>N</sup> N <sup>N</sup> P-Pd(NCCH <sub>3</sub> )] <sub>2</sub> [BF <sub>4</sub> ] <sub>2</sub>                                                                 | <b>S26</b> |
| <b>Figure S43.</b> <sup>13</sup> C{ <sup>1</sup> H} NMR spectrum (CD <sub>3</sub> CN) of [Ph <sub>4</sub> -P <sup>N</sup> N <sup>N</sup> P-Pd(NCCH <sub>3</sub> )] <sub>2</sub> [BF <sub>4</sub> ] <sub>2</sub>                                                                 | <b>S27</b> |
| <b>References</b>                                                                                                                                                                                                                                                               | <b>S27</b> |

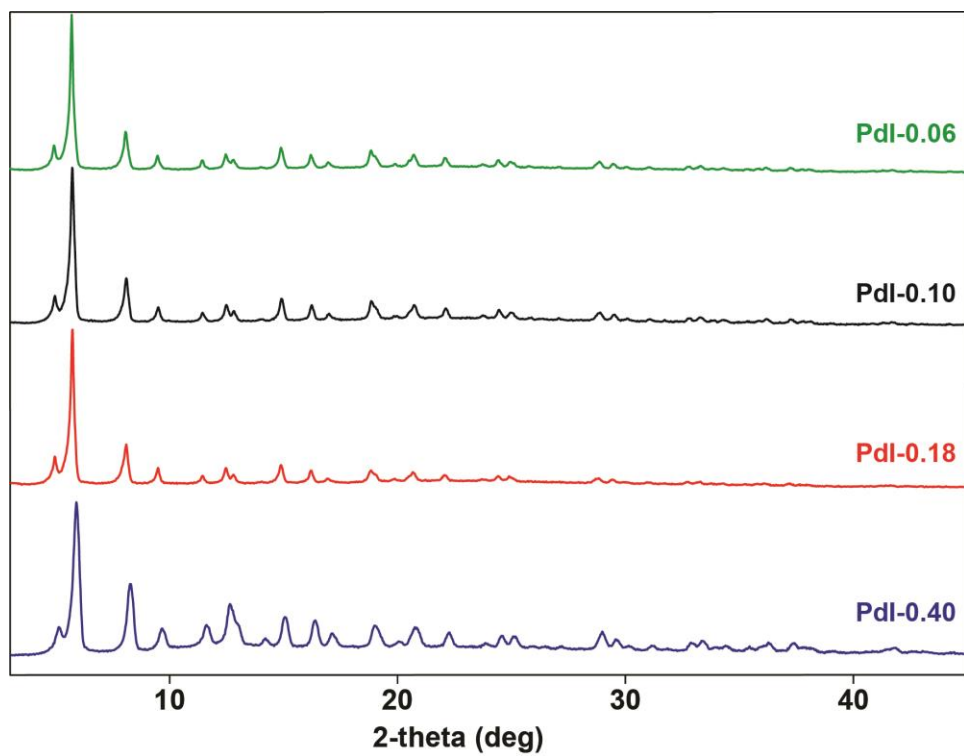

Figure S1. PXRD patterns of PdI-x

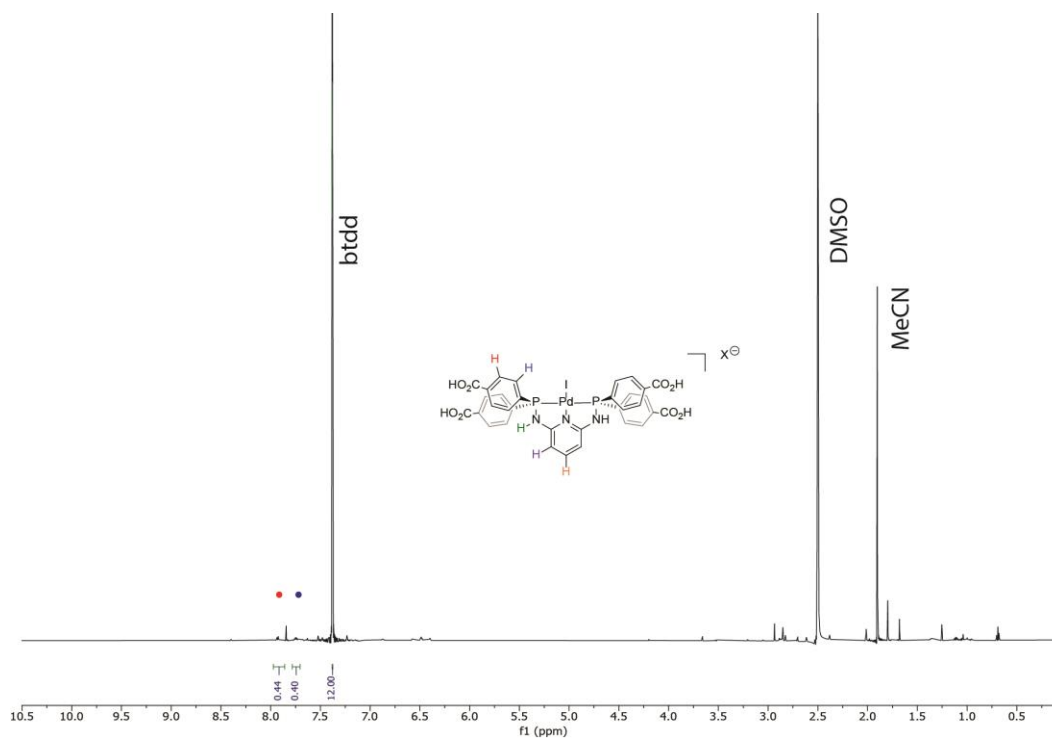

Figure S2. Acid-digested  $^1\text{H}$  NMR spectrum ( $\text{CF}_3\text{CO}_2\text{H}/\text{DMSO-d}_6$ ) of PdI-0.06

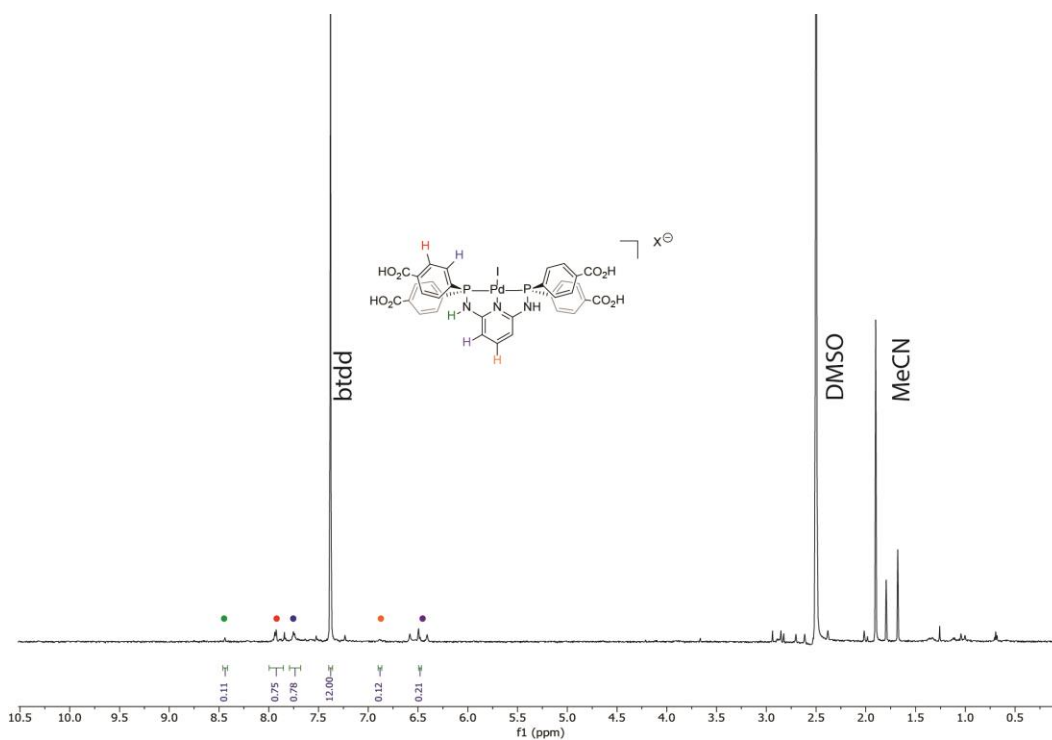

**Figure S3.** Acid-digested  $^1\text{H}$  NMR spectrum ( $\text{CF}_3\text{CO}_2\text{H}/\text{DMSO-d}_6$ ) of **PdI-0.10**

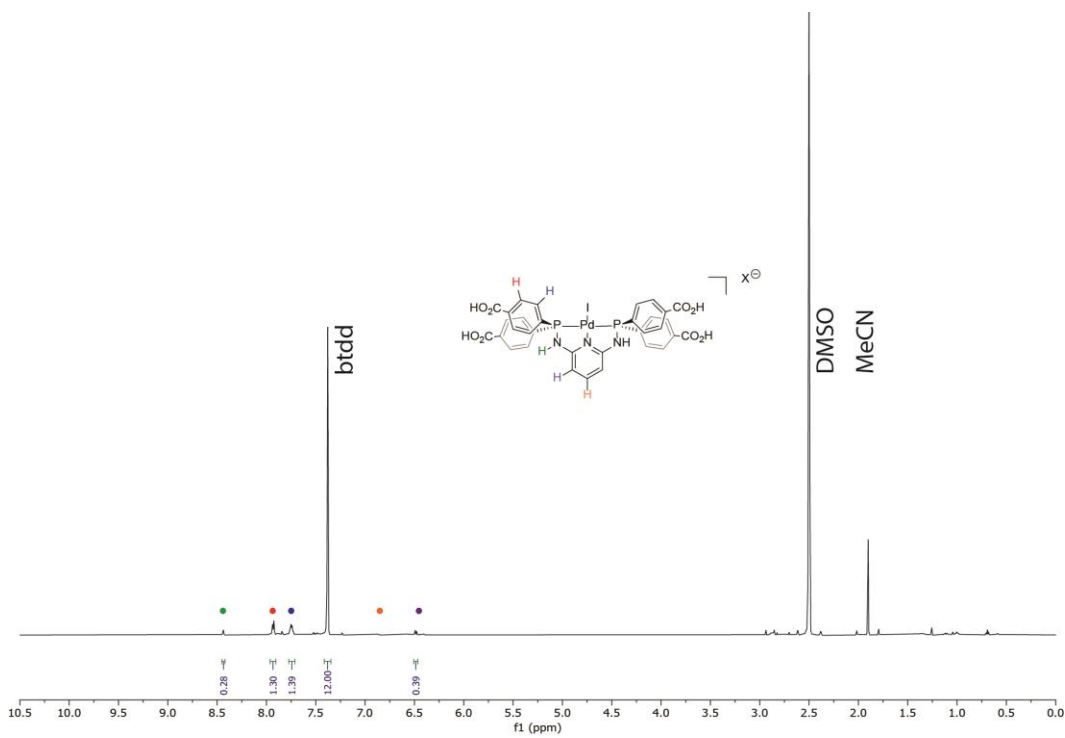

**Figure S4.** Acid-digested  $^1\text{H}$  NMR spectrum ( $\text{CF}_3\text{CO}_2\text{H}/\text{DMSO-d}_6$ ) of **PdI-0.18**

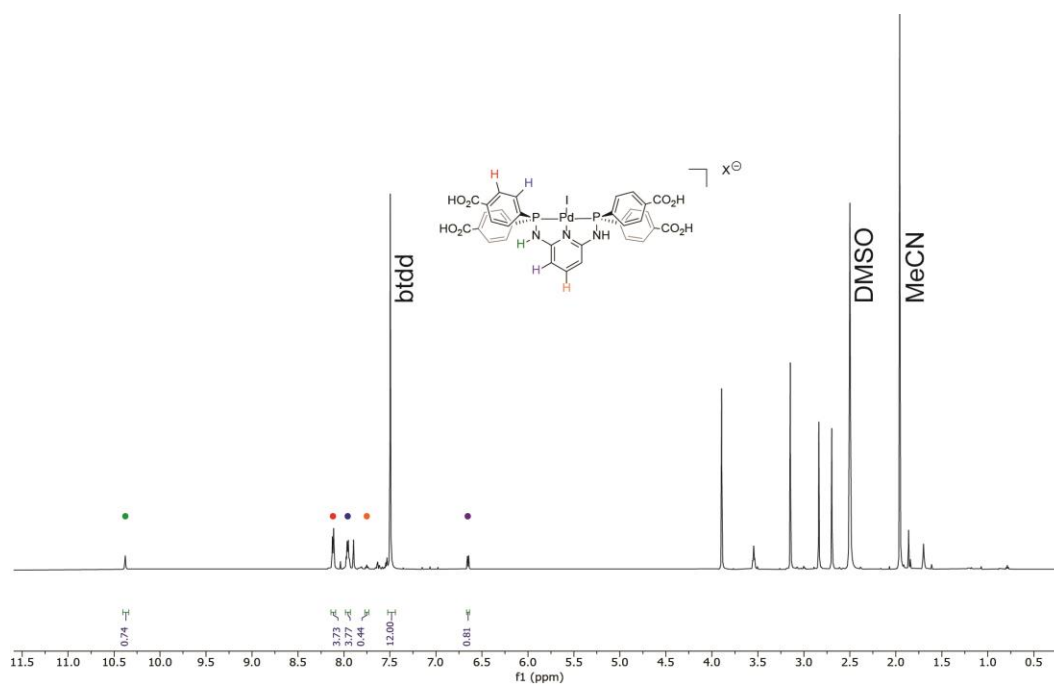

**Figure S5.** Acid-digested  $^1\text{H}$  NMR spectrum ( $\text{CF}_3\text{CO}_2\text{H}/\text{DMSO-d}_6$ ) of **PdI-0.40**

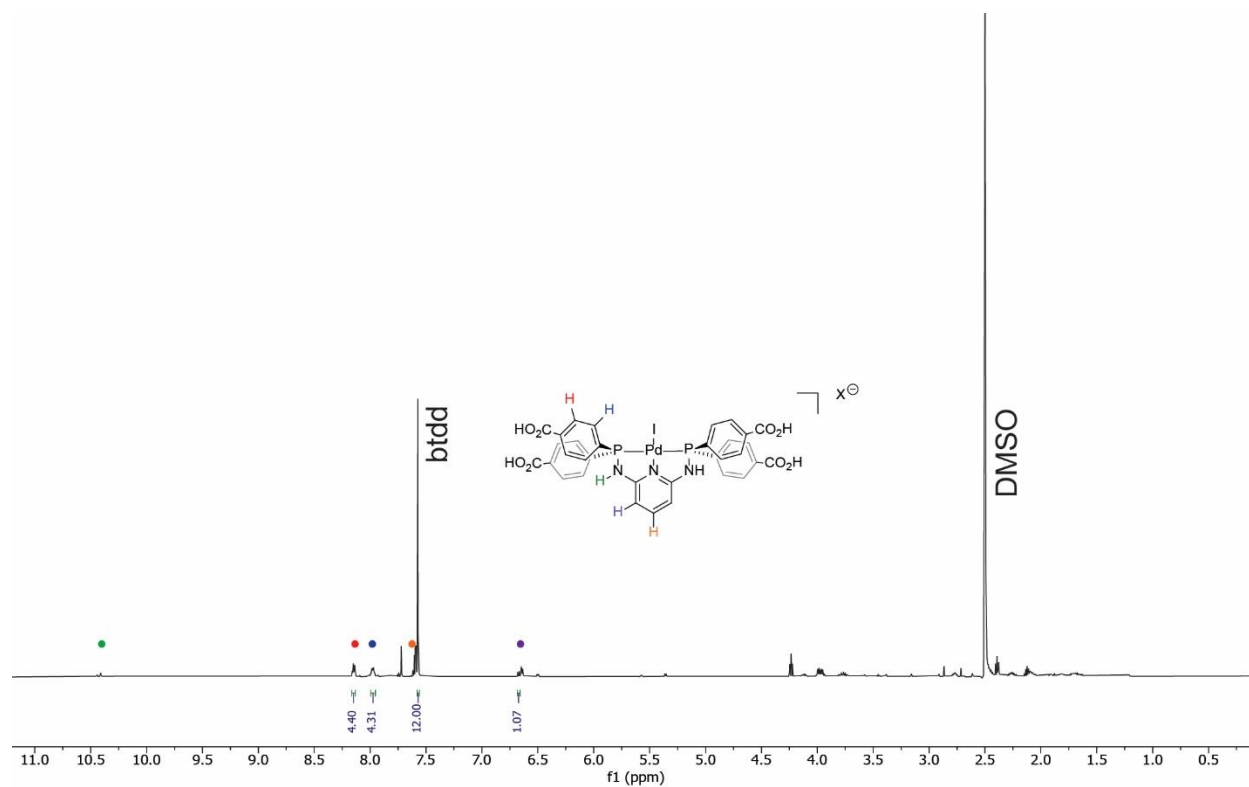

**Figure S6.** Acid-digested  $^1\text{H}$  NMR spectrum ( $\text{CF}_3\text{CO}_2\text{H}/\text{DMSO-d}_6$ ) of **PdI-0.50**

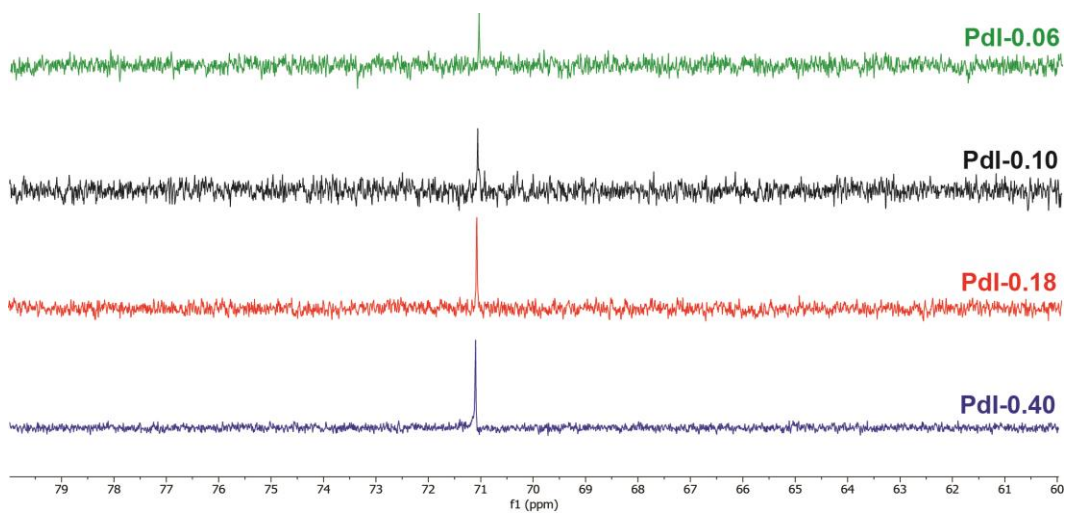

**Figure S7.** Acid-digested  $^{31}\text{P}\{^1\text{H}\}$  NMR spectra ( $\text{CF}_3\text{CO}_2\text{H}/\text{DMSO-d}_6$ ) of **PdI-x**

| Entry | Equiv. of $\text{H}_3(\text{P}^{\text{NN}}\text{NP-PdI})$ added to MFU-4l-OH | Equiv. of $\text{H}_3(\text{P}^{\text{NN}}\text{NP-PdI})$ adsorbed |
|-------|------------------------------------------------------------------------------|--------------------------------------------------------------------|
| 1     | 0.06                                                                         | 0.06                                                               |
| 2     | 0.10                                                                         | 0.10                                                               |
| 3     | 0.16                                                                         | 0.16                                                               |
| 4     | 0.18                                                                         | 0.18                                                               |
| 5     | 0.25                                                                         | 0.25                                                               |
| 6     | 0.40                                                                         | 0.40                                                               |
| 7     | 1.00                                                                         | 0.50                                                               |
| 8     | 1.00 (MFU-4l-Cl)                                                             | 0.00                                                               |

**Figure S8.** Quantification of  $\text{H}_3(\text{P}^{\text{NN}}\text{NP-PdI})$  adsorbed in MFU-4l-OH upon reaction with varying amounts of complex. The amount of  $\text{H}_3(\text{P}^{\text{NN}}\text{NP-PdI})$  added/adsorbed is given as equivalents per formula unit MOF ( $\text{Zn}_5(\text{OH})_4(\text{btdd})_3$ ).

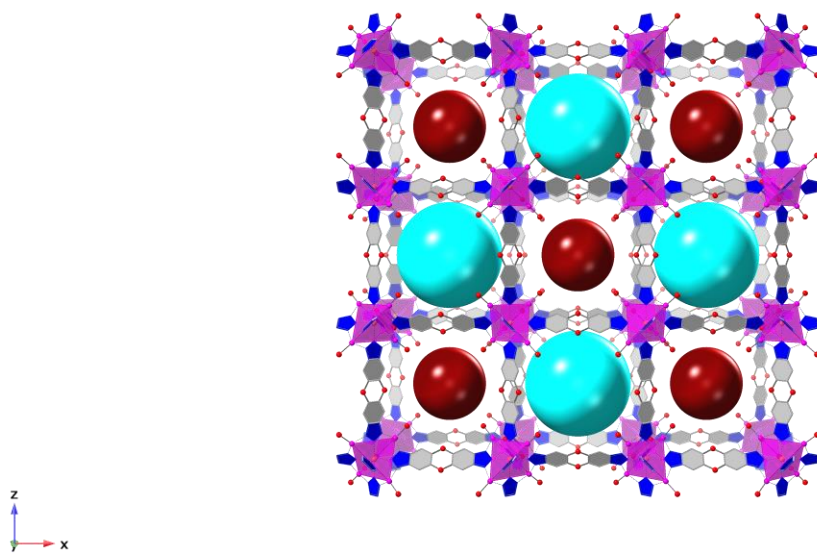

**Figure S9.** Alternating pore structure of MFU-4l-OH showing the Type A (~12 Å, red) and Type B (~18 Å, cyan) pores.

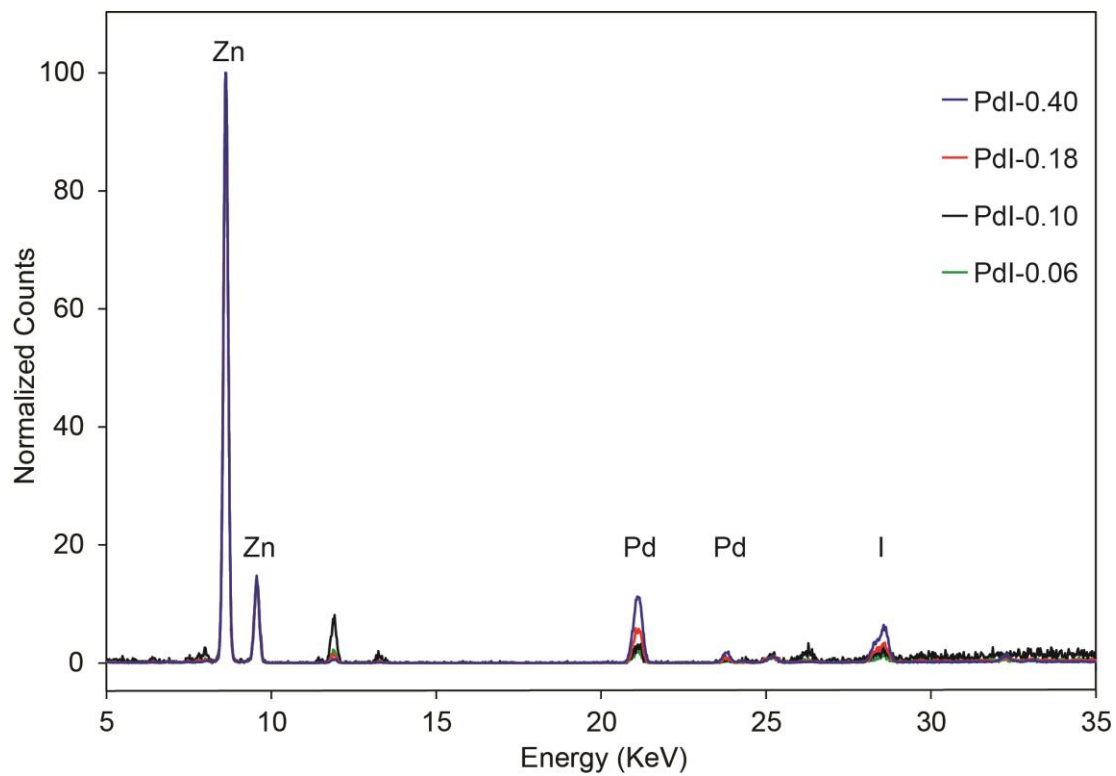

**Figure S10.** XRF spectra of PdI-x

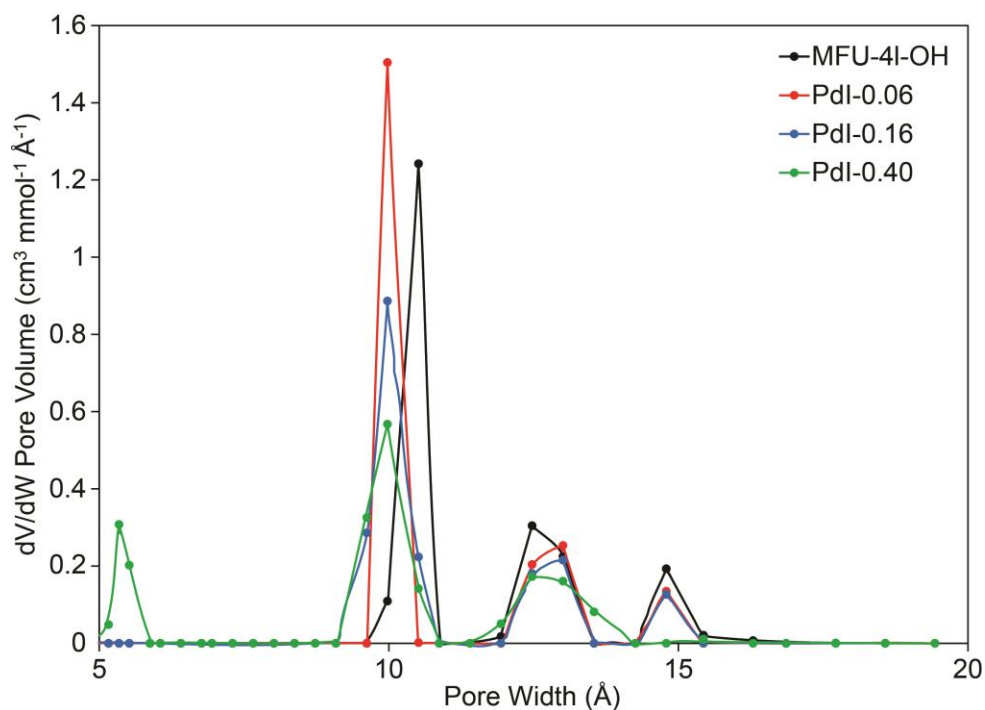

**Figure S11.** DFT differential pore volume plots for MFU-4l-OH, PdI-0.06, PdI-0.16, and PdI-0.40 calculated using the infinite slit adsorption model with 2D-non-local density functional theory.

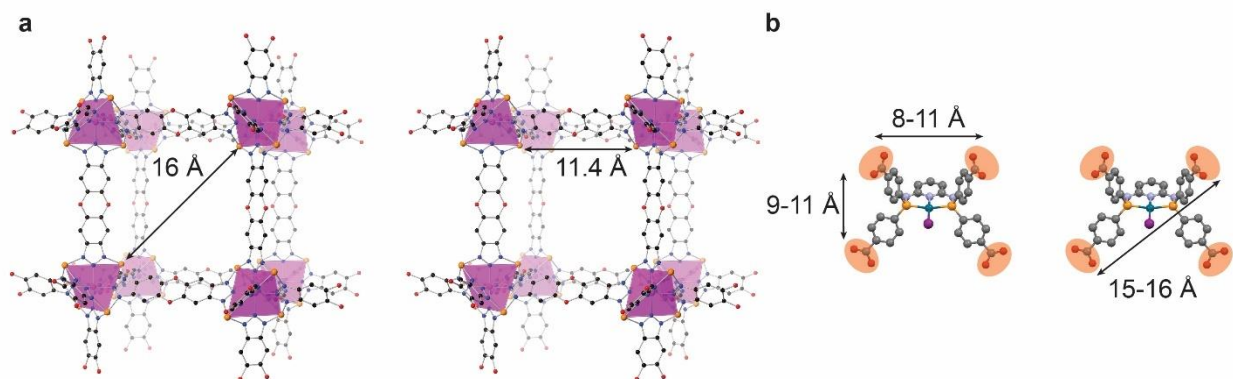

**Figure 12.** a) Approximate Zn...Zn intercluster distances in the Zn-OH functionalized pore of MFU-4l-OH. b) Approximate distances between the carboxylic acid groups of H<sub>3</sub>(PNNNP-PdI).

The similarity between the MFU-4l-OH intercluster distances and distances between the carboxylic acid groups of H<sub>3</sub>(PNNNP-PdI) support the notion that the encapsulated PNNNP-PdI complex can simultaneously bind to multiple Zn sites of the node.



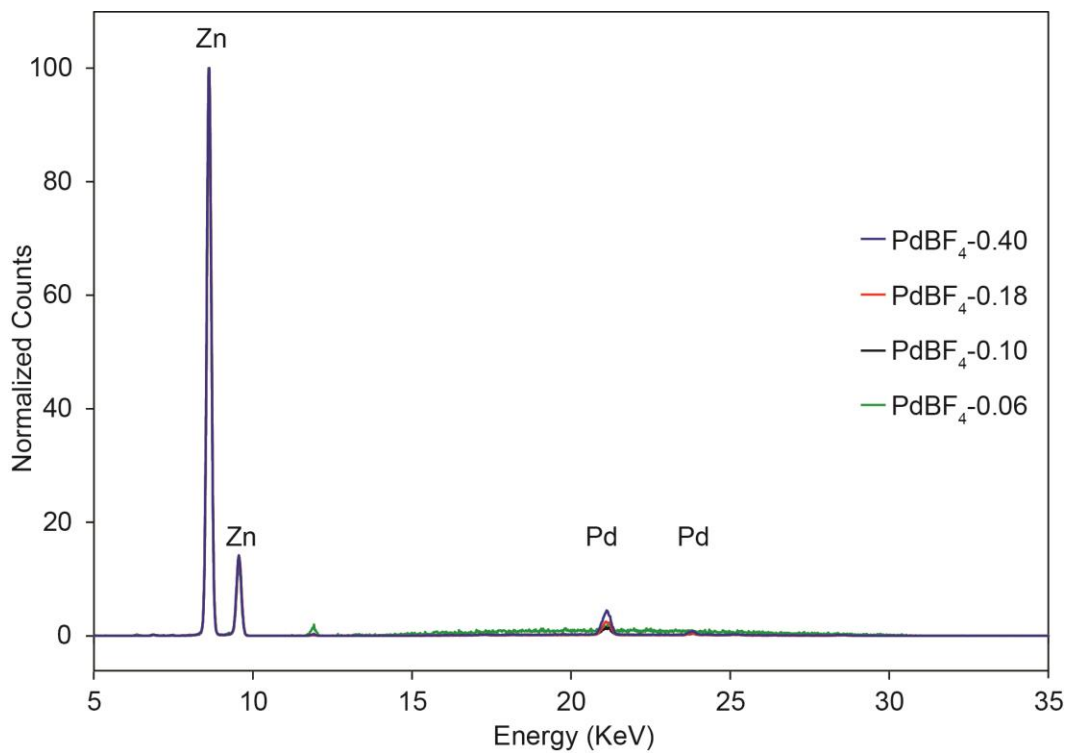

**Figure S13.** XRF spectra of  $\text{PdBF}_4-x$

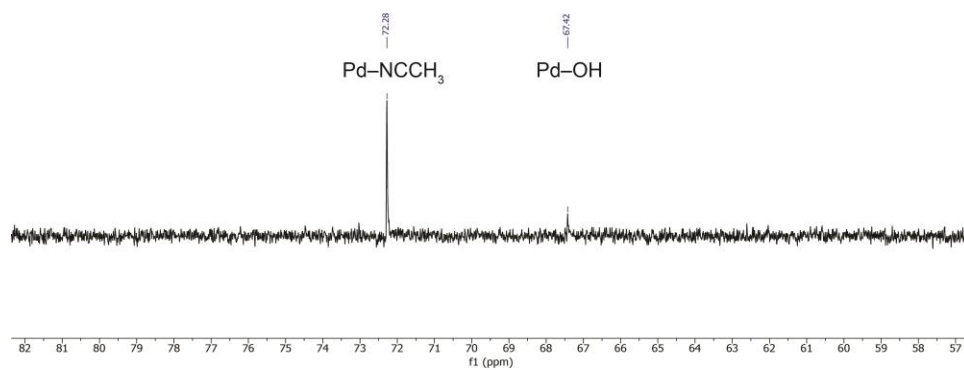

**Figure S14.** Acid-digested  $^{31}\text{P}\{^1\text{H}\}$  NMR spectrum ( $\text{CF}_3\text{CO}_2\text{H}/\text{DMSO-d}_6$ ) of  $\text{PdBF}_4-0.40$

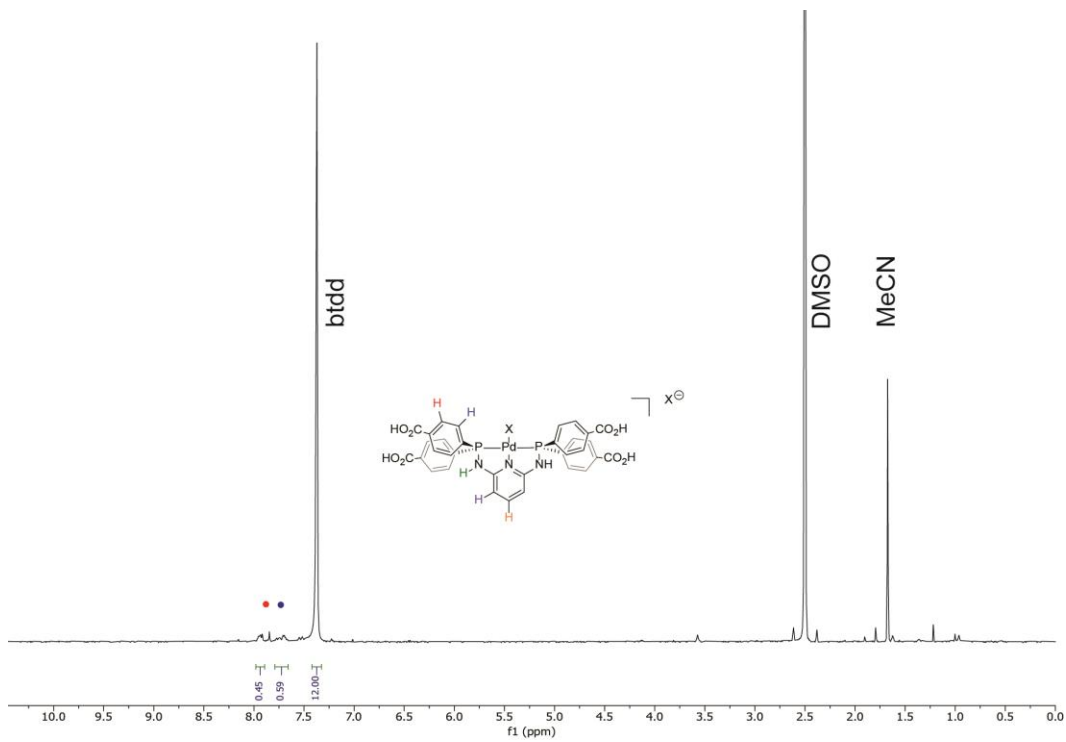

**Figure S15.** Acid digested  $^1\text{H}$  NMR spectrum ( $\text{CF}_3\text{CO}_2\text{H}/\text{DMSO-d}_6$ ) of **PdBF<sub>4</sub>-0.06**

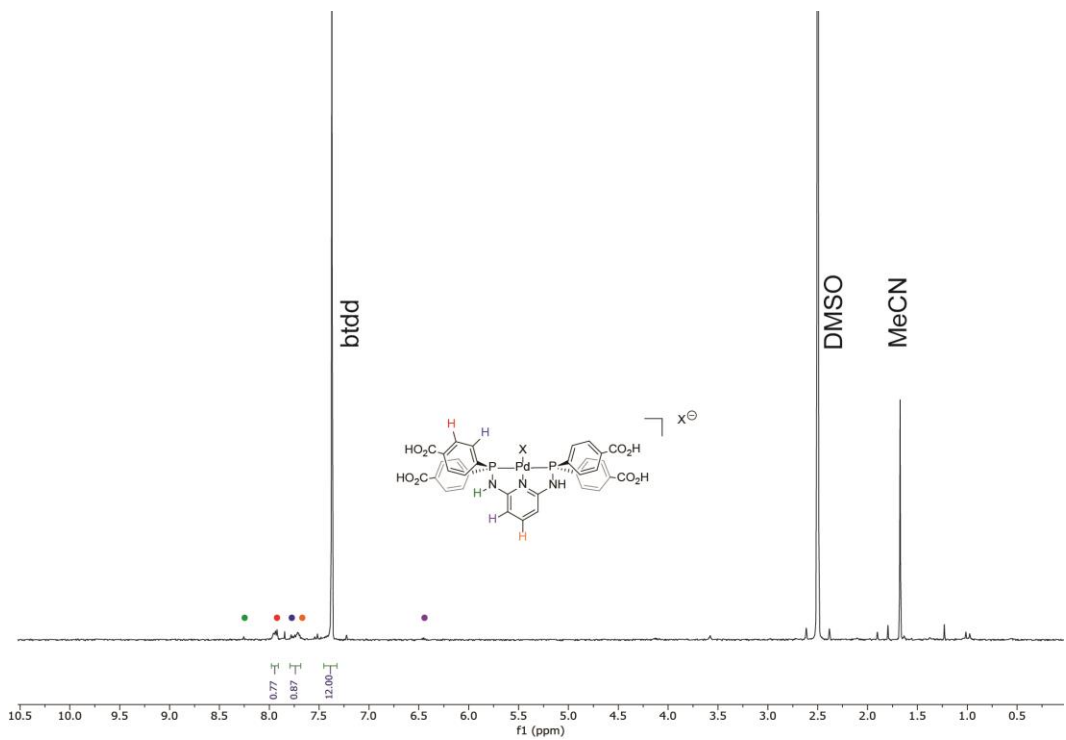

**Figure S16.** Acid digested  $^1\text{H}$  NMR spectrum ( $\text{CF}_3\text{CO}_2\text{H}/\text{DMSO-d}_6$ ) of **PdBF<sub>4</sub>-0.10**

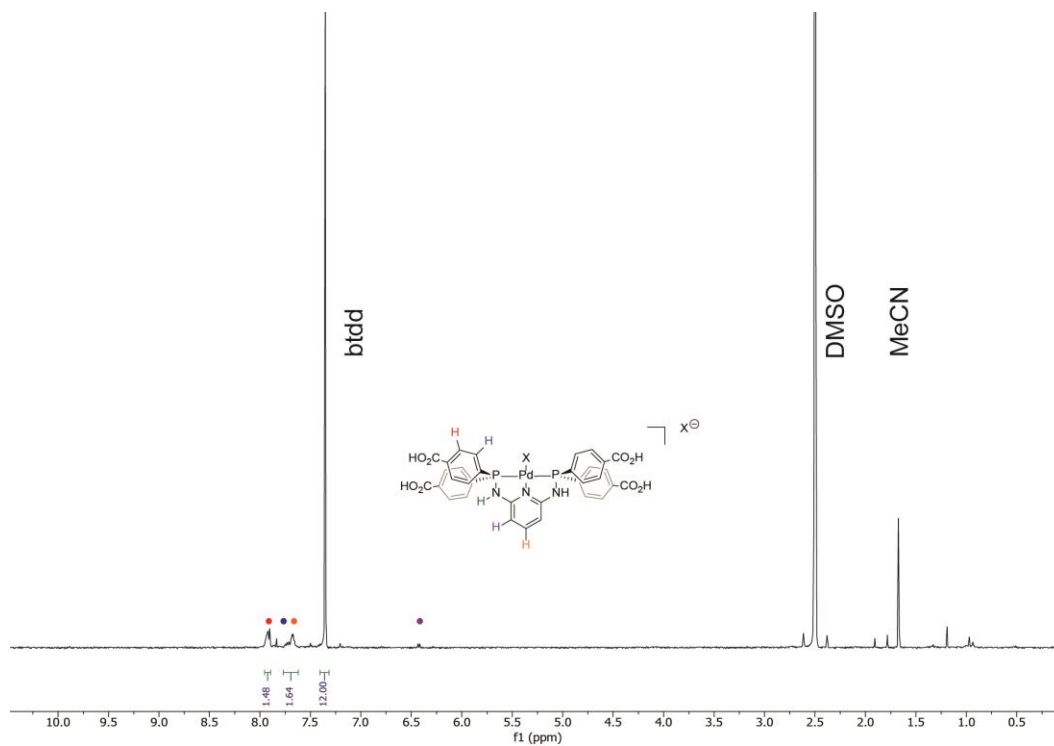

Figure S17. Acid digested  $^1\text{H}$  NMR spectrum (CF<sub>3</sub>CO<sub>2</sub>H/ DMSO-d<sub>6</sub>) of PdBF<sub>4</sub>-0.18

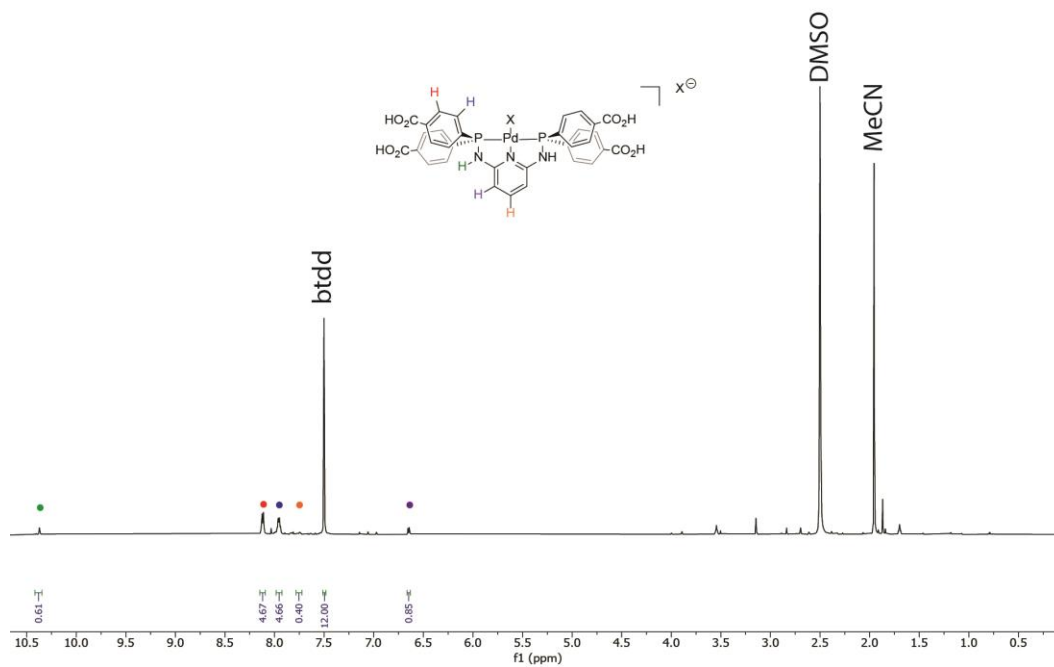

Figure S18. Acid digested  $^1\text{H}$  NMR spectrum (CF<sub>3</sub>CO<sub>2</sub>H/DMSO) of PdBF<sub>4</sub>-0.40

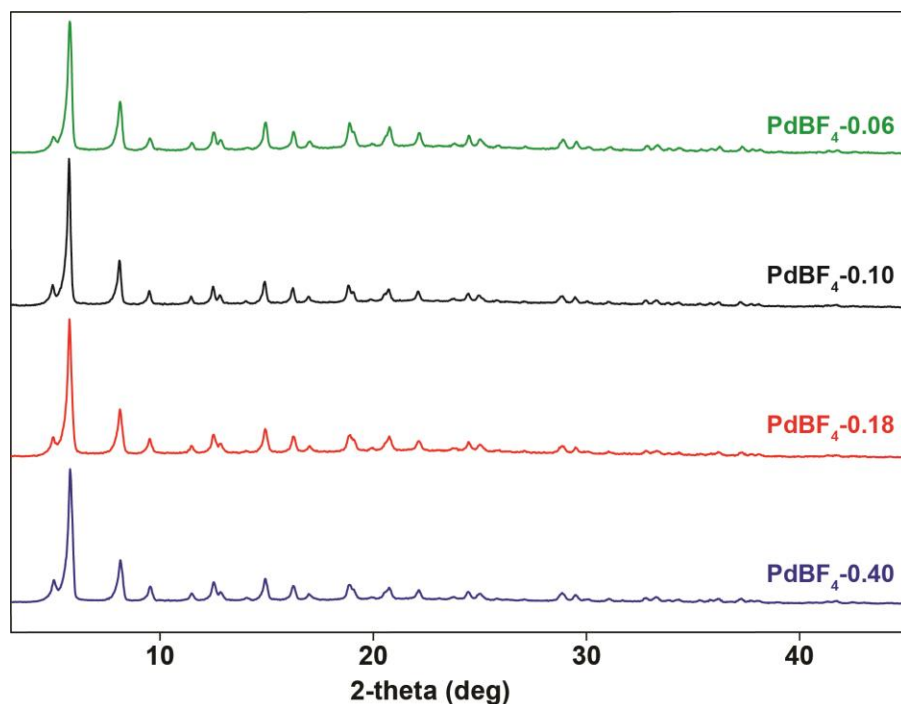

**Figure S19.** PXRD patterns of  $\text{PdBF}_4\text{-}x$

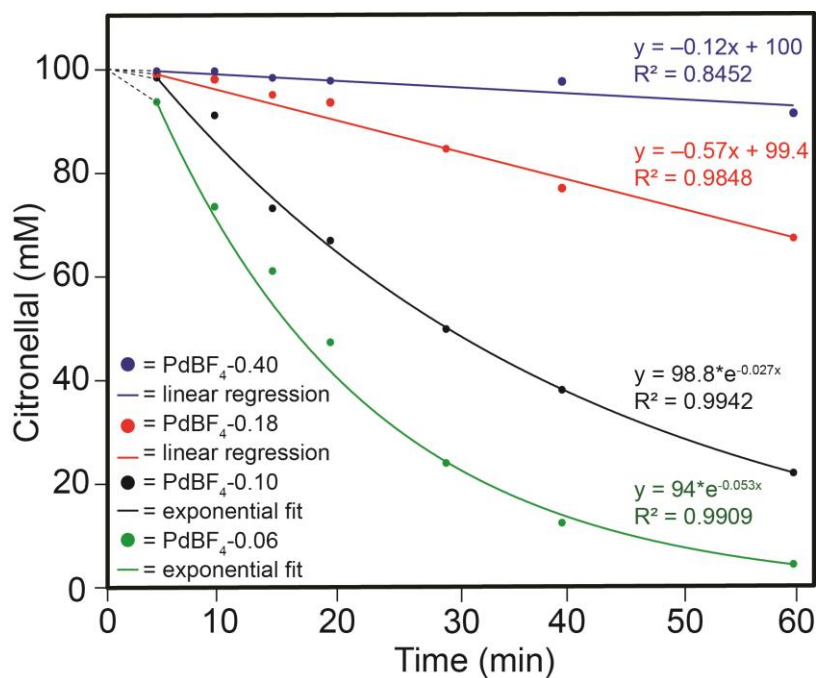

**Figure S20.** Experimental kinetic data collected during the catalytic cyclization of citronellal (100 mM) with  $\text{PdBF}_4\text{-}x$  (0.5 mol % Pd) using a single term exponential fit at loadings of  $x = 0.06$  (green) and  $0.10$  (black) equiv. Pd per formula unit. At loadings of  $x = 0.18$  (red) and  $0.40$  (blue) equiv. Pd per formula unit, a linear regression model is used for fitting.

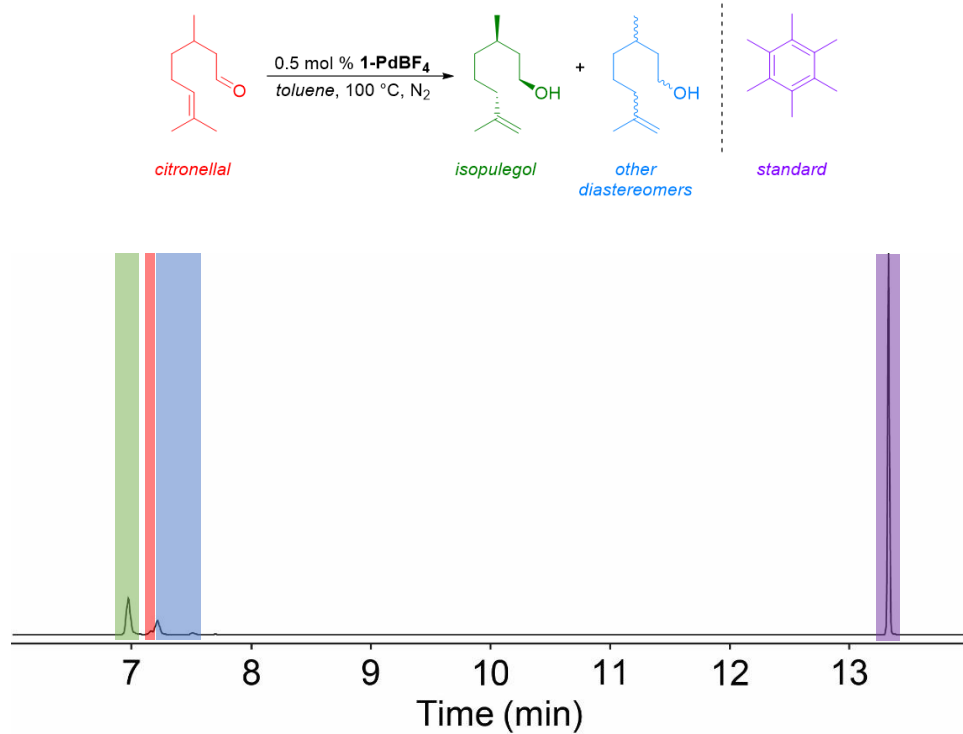

| Substrate         | Retention Time (min) | Integration (a.u) | Response Factor | Yield (%) |
|-------------------|----------------------|-------------------|-----------------|-----------|
| isopulegol        | 6.987                | 390229            | 1.98            | 62        |
| Citronellal       | 7.182                | 31803             | 1.98            | 5         |
| Diastereomers     | 7.233-7.720          | 205349            | 1.98            | 33        |
| Hexamethylbenzene | 13.322               | 1845798           | 1.00            | —         |

**Figure S21.** GC-FID trace of the carbonyl-ene cyclization of citronellal with PdBF<sub>4</sub>-0.06 (0.5 mol % Pd) (0.2 mmol hexamethylbenzene internal standard)

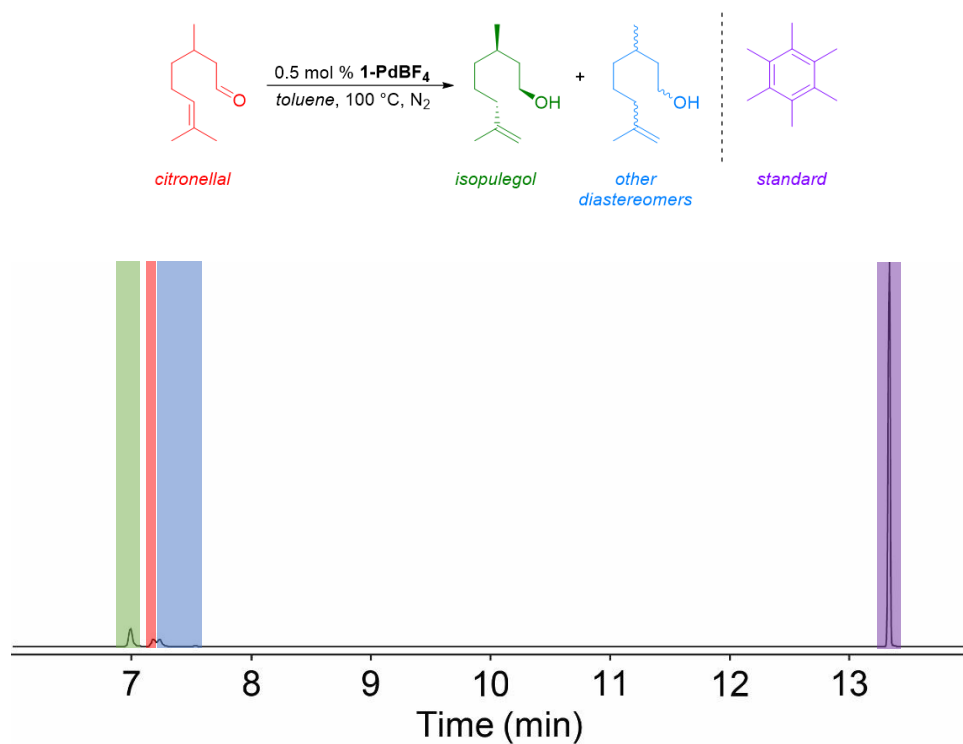

| Substrate         | Retention Time (min) | Integration (a.u) | Response Factor | Yield (%) |
|-------------------|----------------------|-------------------|-----------------|-----------|
| Isopulegol        | 6.987                | 268065            | 1.98            | 51        |
| Citronellal       | 7.182                | 120160            | 1.98            | 22        |
| Diastereomers     | 7.233-7.720          | 142103            | 1.98            | 27        |
| Hexamethylbenzene | 13.322               | 2803957           | 1.00            | —         |

**Figure S22.** GC-FID trace of the carbonyl-ene cyclization of citronellal with **PdBF<sub>4</sub>-0.10** (0.5 mol % Pd) (0.2 mmol hexamethylbenzene internal standard)

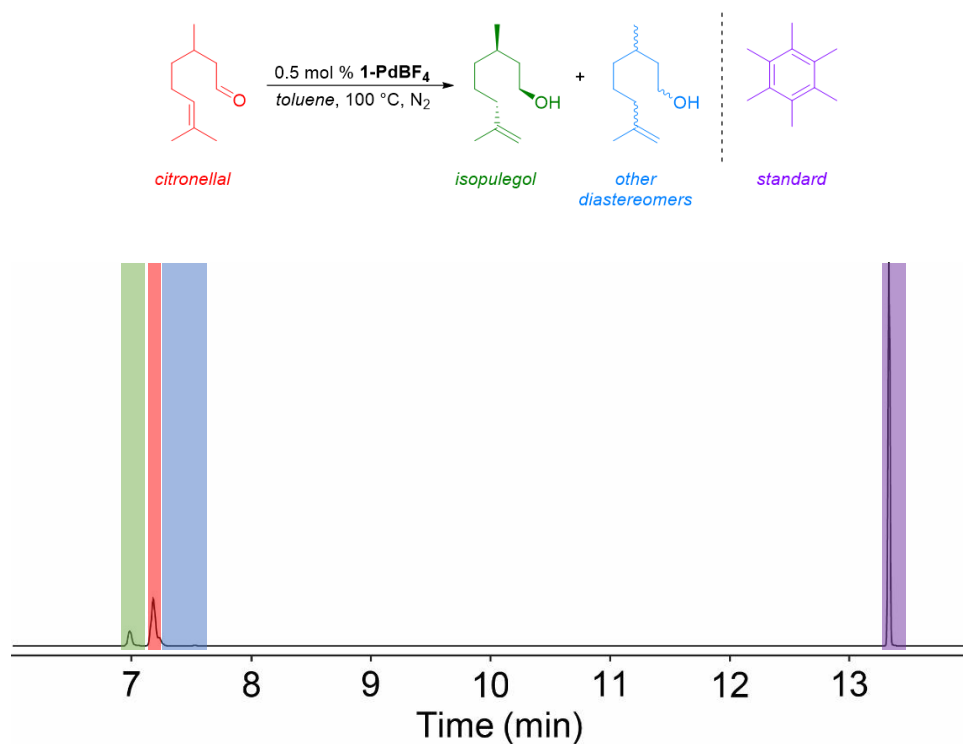

| Substrate         | Retention Time (min) | Integration (a.u) | Response Factor | Yield (%) |
|-------------------|----------------------|-------------------|-----------------|-----------|
| Isopulegol        | 6.987                | 206918            | 1.98            | 21        |
| Citronellal       | 7.182                | 678981            | 1.98            | 68        |
| Diastereomers     | 7.233-7.720          | 113207            | 1.98            | 11        |
| Hexamethylbenzene | 13.322               | 2455973           | 1.00            | —         |

**Figure S23.** GC-FID trace of the carbonyl-ene cyclization of citronellal with **PdBF<sub>4</sub>-0.18** (0.5 mol % Pd) (0.2 mmol hexamethylbenzene internal standard)

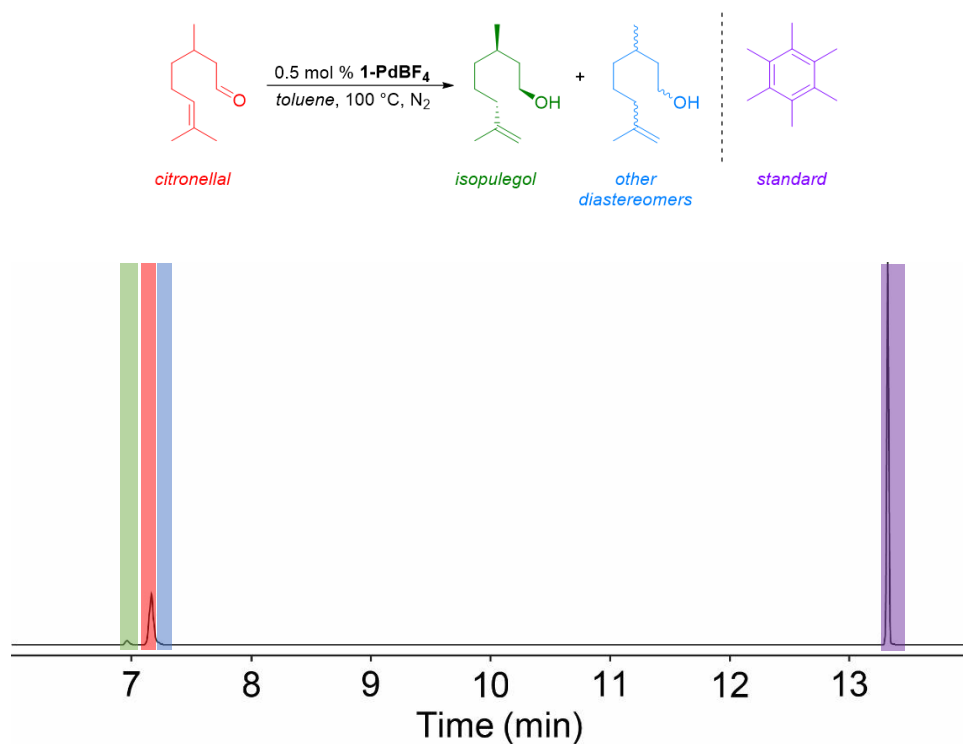

| Substrate         | Retention Time (min) | Integration (a.u) | Response Factor | Yield (%) |
|-------------------|----------------------|-------------------|-----------------|-----------|
| Isopulegol        | 6.987                | 77705             | 1.98            | 7.6       |
| Citronellal       | 7.182                | 941518            | 1.98            | 92        |
| Diastereomers     | 7.233-7.720          | 4288              | 1.98            | 0.4       |
| Hexamethylbenzene | 13.322               | 3282212           | 1.00            | —         |

**Figure S24.** GC-FID trace of the carbonyl-ene cyclization of citronellal with PdBF<sub>4</sub>-0.40 (0.5 mol % Pd) (0.2 mmol hexamethylbenzene internal standard)

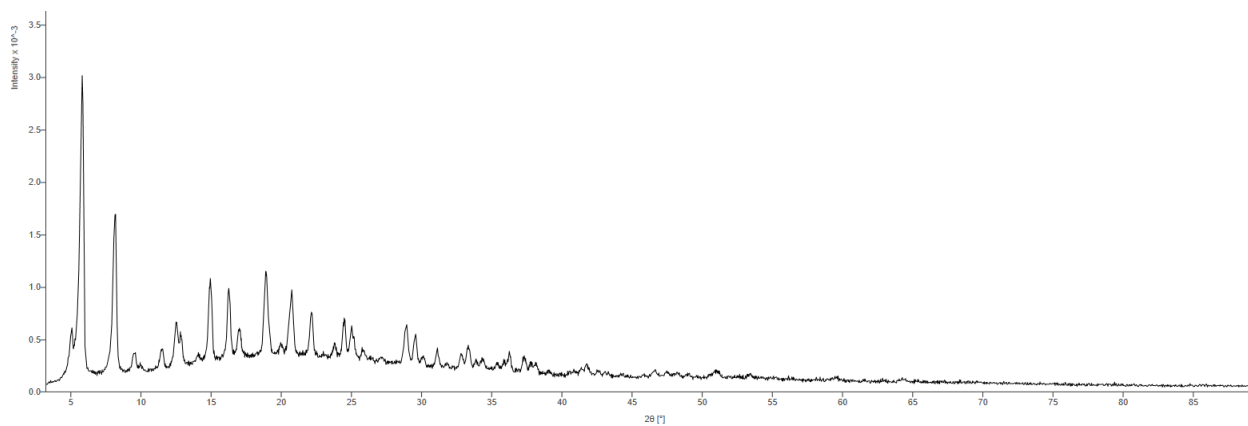

**Figure S25.** PXRD pattern of PdBF<sub>4</sub>-0.06 after recyclability studies



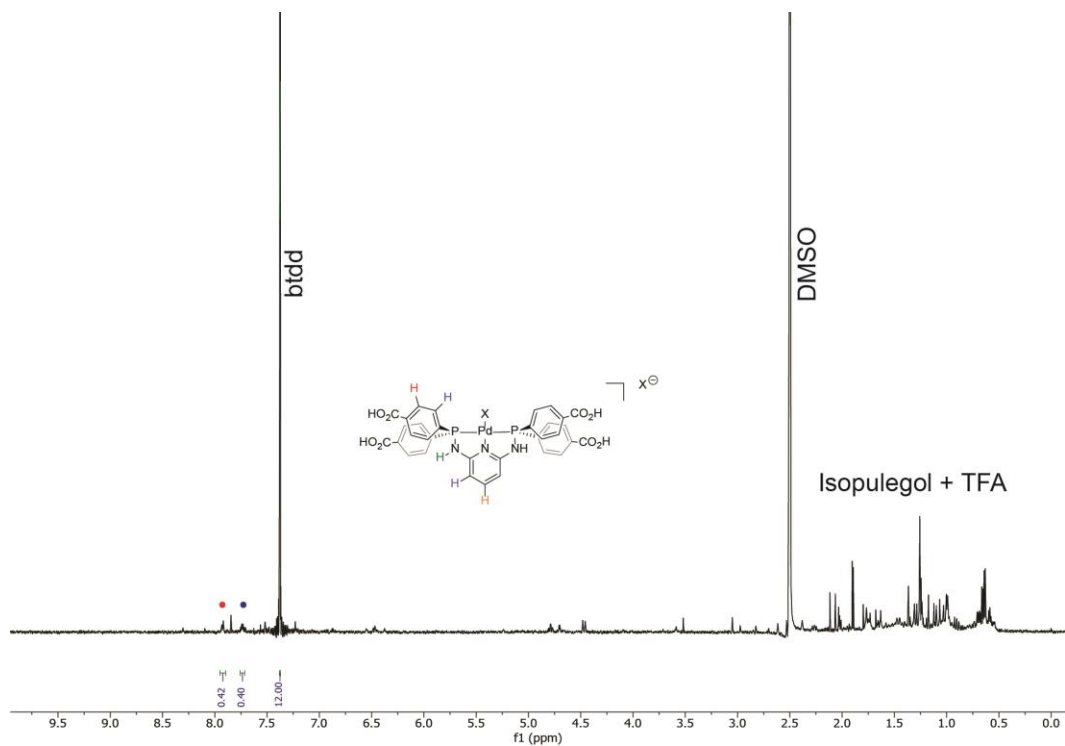

**Figure S26.** Acid digested  $^1\text{H}$  NMR spectrum ( $\text{CF}_3\text{CO}_2\text{H}/\text{DMSO-d}_6$ ) of **PdBF<sub>4</sub>-0.06** after catalysis

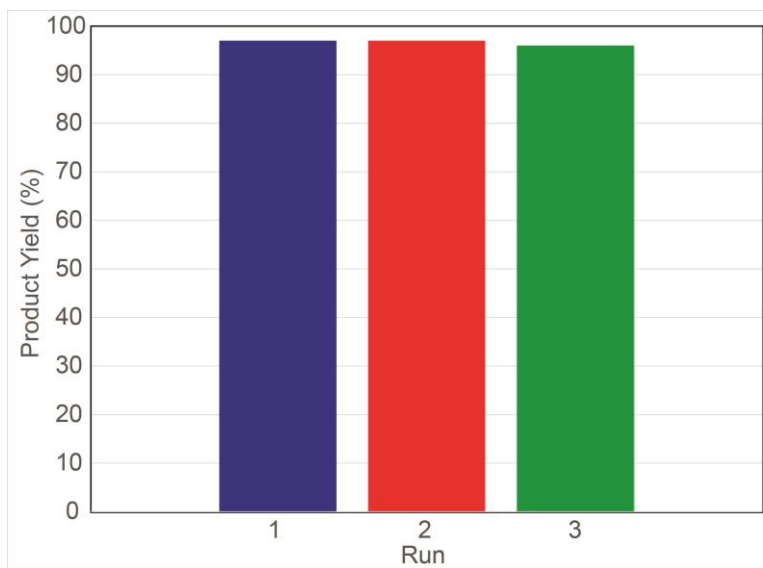

**Figure S27.** Experimental data collected for recycled catalyst during the cyclization of citronellal (100 mM) with **PdBF<sub>4</sub>-0.06**

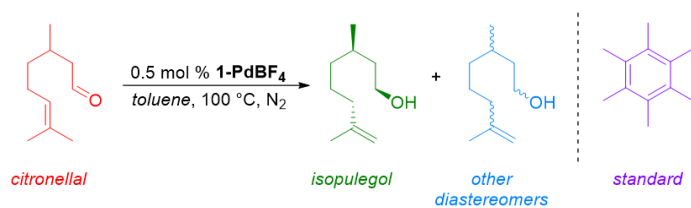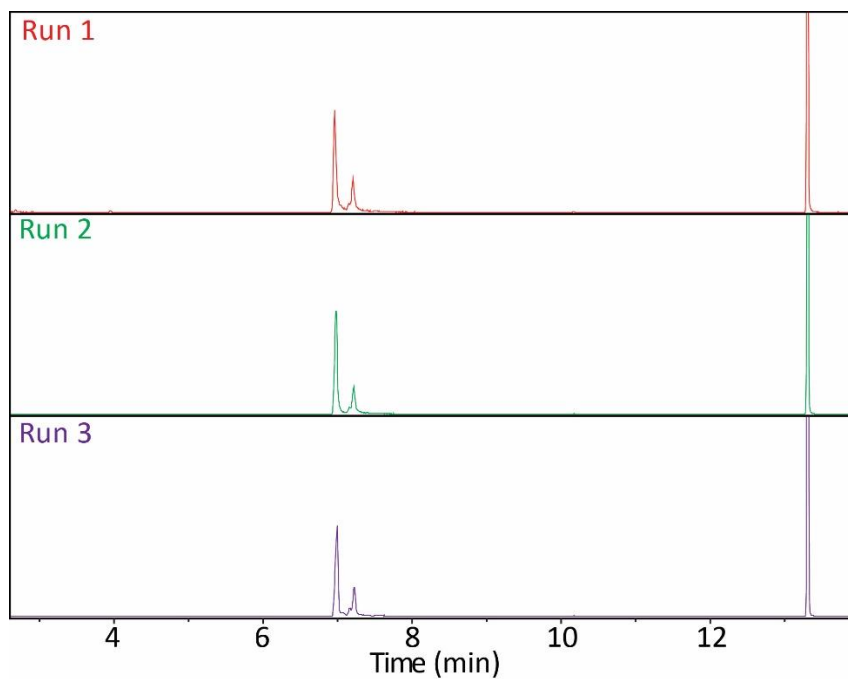

| Analyte           | Retention Time (min) | Response Factor | Integration Run 1 | Yield (%) Run 1 | Integration (a.u) Run 2 | Yield (%) Run 2 | Integration Run 3 | Yield (%) Run 3 |
|-------------------|----------------------|-----------------|-------------------|-----------------|-------------------------|-----------------|-------------------|-----------------|
| Isopulegol        | 6.987                | 1.98            | 179397            | 74.6            | 796064                  | 77.9            | 1176068           | 74.9            |
| Citronellal       | 7.182                | 1.98            | 7123              | 3.0             | 34737                   | 3.4             | 68142             | 4.3             |
| Diastereomers     | 7.233-7.720          | 1.98            | 54039             | 22.4            | 190969                  | 18.7            | 326638            | 20.8            |
| Hexamethylbenzene | 13.322               | 1.00            | 1057531           | —               | 3789368                 | —               | 5611119           | —               |

**Figure S28.** GC-FID data collected for the catalyst recycling studies with **PdBF<sub>4</sub>-0.06** (0.5 mol % Pd, 0.2 mmol hexamethylbenzene internal standard).

**Procedure for hot filtration test.** The catalytic citronellal cyclization reaction was prepared as described in the Experimental section with **PdBF<sub>4</sub>-0.18** (0.5 mol % Pd) following minor modifications. A 100 mM solution of citronellal in toluene containing a known amount of hexamethylbenzene as an internal standard was combined with 0.5 mol% **PdBF<sub>4</sub>-0.18**. The reaction mixture was heated and monitored by GC-FID to determine product yields. After 20 minutes, the reaction mixture was decanted from the solid MOF and filtered through a 0.45 μm syringe filter. The reaction was transferred to a clean vial, sealed, and allowed to proceed for an additional 40 minutes. Reaction aliquots were periodically characterized by GC-FID and showing no substrate conversion after removal of the MOF catalyst.

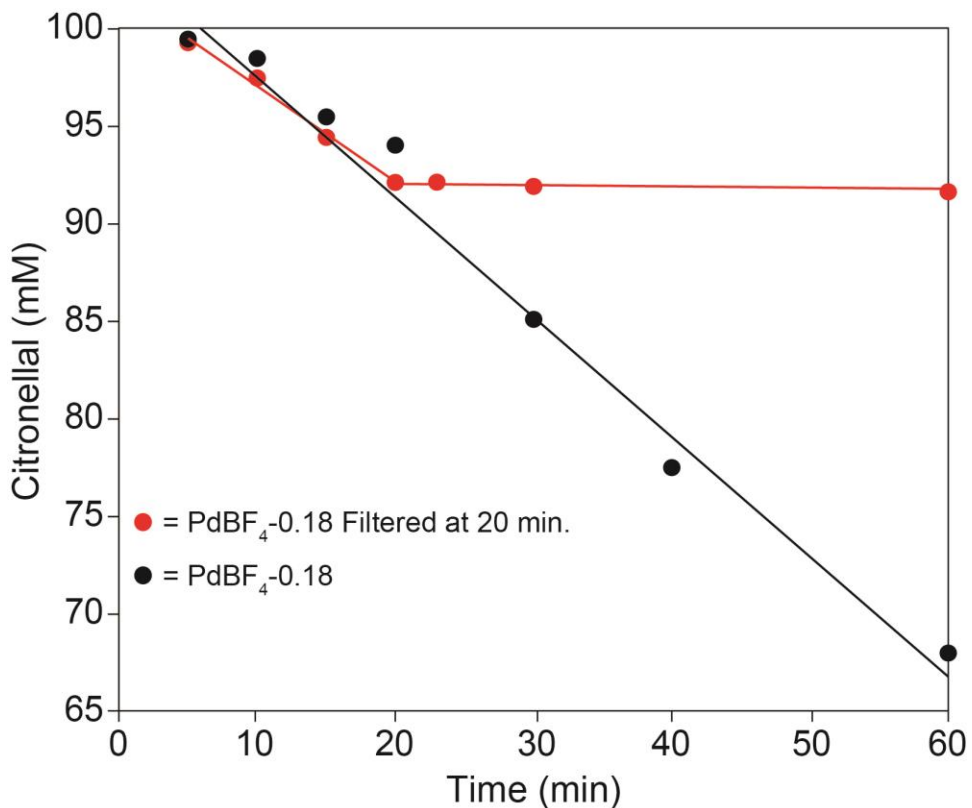

**Figure S29.** Experimental data collected during hot filtration test for the cyclization of citronellal (100 mM) with **PdBF<sub>4</sub>-0.18**

| Entry | Catalyst                                  | mmol·g <sub>cat</sub> <sup>-1</sup> ·h <sup>-1</sup> | Ref |
|-------|-------------------------------------------|------------------------------------------------------|-----|
| 1     | PdBF <sub>4</sub> -0.06                   | 9.16                                                 | --  |
| 2     | PdBF <sub>4</sub> -0.10                   | 12.20                                                | --  |
| 3     | PdBF <sub>4</sub> -0.18                   | 8.48                                                 | --  |
| 4     | PdBF <sub>4</sub> -0.40                   | 4.10                                                 | --  |
| 5     | Sn-beta (Si:Sn 82)                        | 341.17                                               | 1   |
| 7     | MOF-808-2.5SO <sub>4</sub>                | 83.10                                                | 2   |
| 9     | hcp UiO-66                                | 9.60                                                 | 3   |
| 10    | UiO-66                                    | 8.83                                                 | 3   |
| 11    | UiO-66-NO <sub>2</sub>                    | 4.93                                                 | 4   |
| 12    | UiO-66-NO <sub>2</sub> -10 <sub>HCl</sub> | 2.14                                                 | 5   |
| 13    | Dehydrated UiO-66                         | 1.32                                                 | 6   |
| 14    | UiO-66-350                                | 1.00                                                 | 7   |
| 15    | Pd@MIL-101-Cr                             | 0.92                                                 | 8   |
| 16    | MIL-101-Cr                                | 0.62                                                 | 8   |
| 17    | Zr-Ti-NDC                                 | 0.56                                                 | 9   |
| 18    | Cu <sub>3</sub> (btc) <sub>2</sub>        | 0.55                                                 | 10  |
| 19    | Hydrated UiO-66                           | 0.43                                                 | 6   |
| 20    | MIL-100(Fe)                               | 0.18                                                 | 11  |

**Figure S30.** Literature examples of heterogenous catalysts for the cyclization of citronellal. Activity is reported as mmol of substrate consumed per gram of catalyst per hour (mmol·g<sub>cat</sub><sup>-1</sup>·h<sup>-1</sup>).

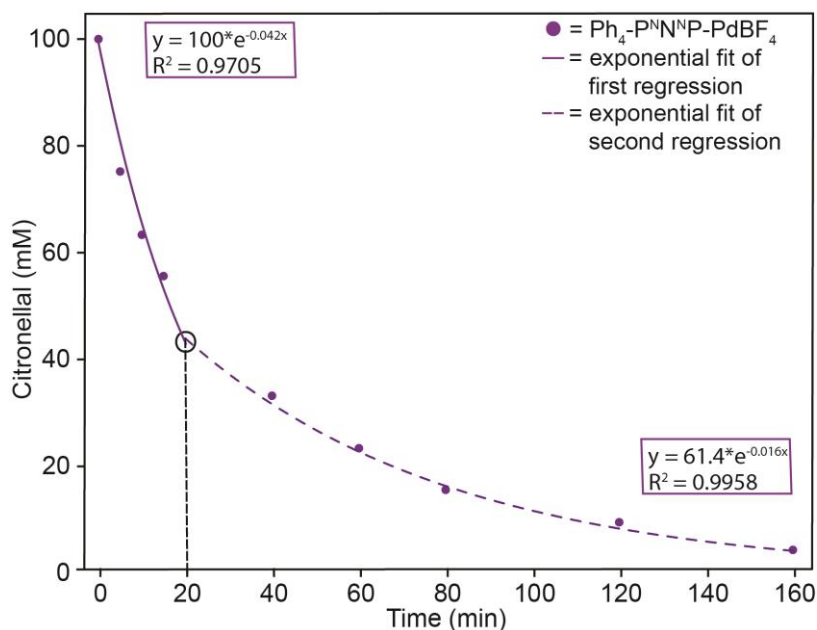

**Figure S31.** Experimental data collected during the cyclization of citronellal (100 mM) with Ph<sub>4</sub>-P<sup>N</sup>N<sup>N</sup>P-PdBF<sub>4</sub> (0.5 mol % Pd) using single term exponential fits.

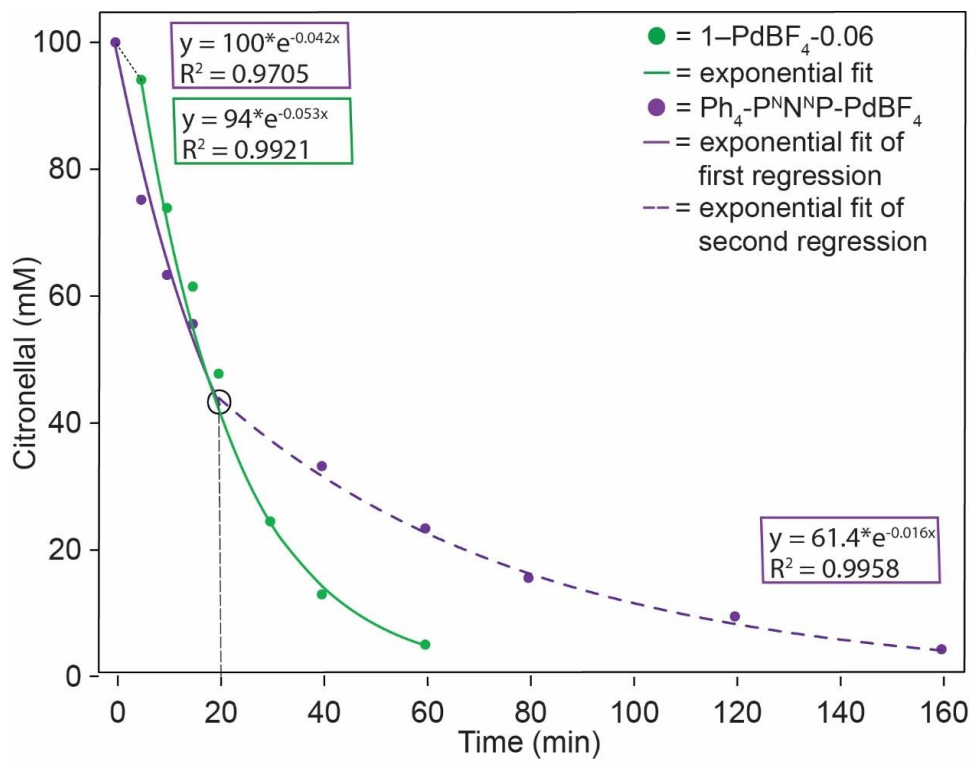

**Figure S32.** Experimental data collected during the catalytic cyclization of citronellal (100 mM) with **PdBF<sub>4</sub>-0.06** (0.5 mol % Pd) using a single term exponential fit (green) and **Ph<sub>4</sub>-P<sup>N</sup>N<sup>N</sup>P-PdBF<sub>4</sub>** using two separate single term exponential fits (purple).

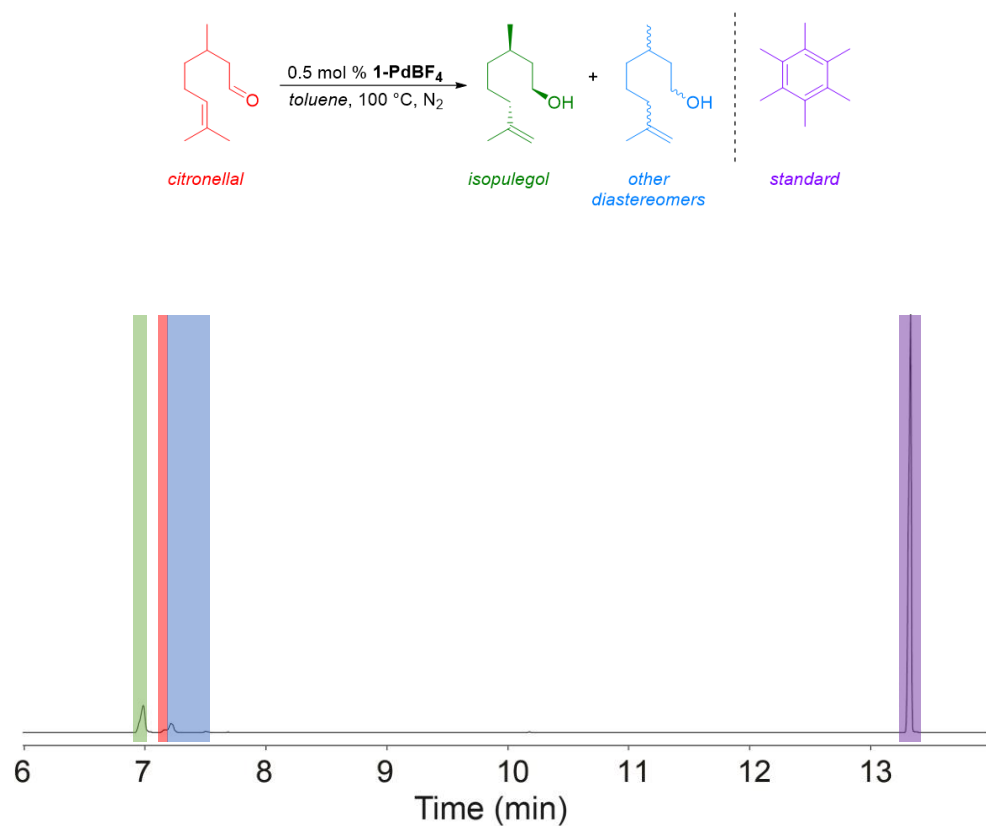

| Analyte           | Retention Time (min) | Integration (a.u) | Response Factor | Yield (%) |
|-------------------|----------------------|-------------------|-----------------|-----------|
| Isopulegol        | 6.987                | 816483            | 1.98            | 69.3      |
| Citronellal       | 7.182                | 49783             | 1.98            | 4.3       |
| Diastereomers     | 7.233-7.720          | 315448            | 1.98            | 26.4      |
| Hexamethylbenzene | 13.322               | 6401646           | 1.00            | —         |

**Figure S33.** GC-FID trace of the carbonyl-ene cyclization of citronellal with Ph<sub>4</sub>-P<sup>N</sup>N<sup>N</sup>P-PdBF<sub>4</sub> (0.5 mol % Pd) (0.2 mmol hexamethylbenzene internal standard)

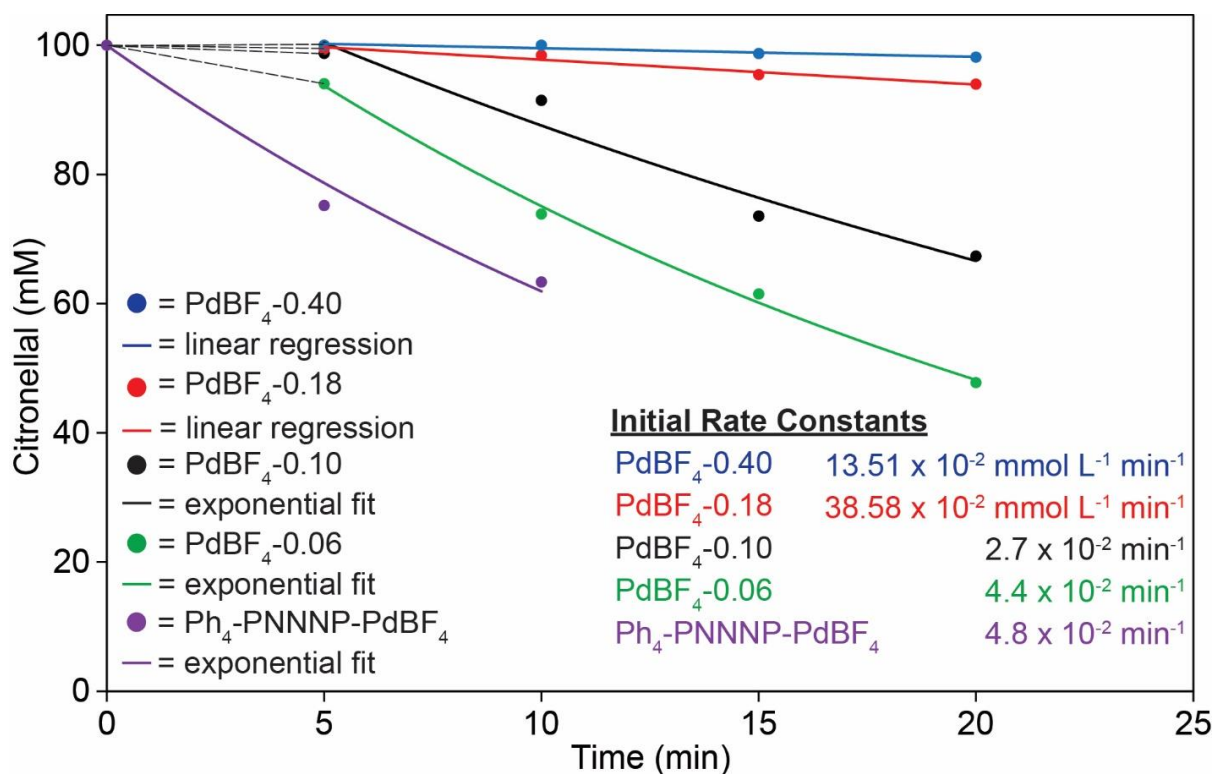

**Figure S34.** Initial rate constants calculated from the experimental data collected during the first time points for the cyclization of citronellal (100 mM) with the **PdBF<sub>4</sub>-x** series and the homogenous catalyst Ph<sub>4</sub>-PNNNP-PdBF<sub>4</sub> (0.5 mol % Pd)

#### Overview and Preparation of Homogenous Analogue Ph<sub>4</sub>-PNNNP-PdBF<sub>4</sub>

Ph<sub>4</sub>-PNNNP-PdBF<sub>4</sub> was synthesized from Ph<sub>4</sub>-PNNNP-PdI according to the method reported previously for tBu<sub>4</sub>-PNNNP-PdBF<sub>4</sub>.<sup>12</sup> Oxidative ligand exchange of I<sup>-</sup> for BF<sub>4</sub><sup>-</sup> was carried out using 5 equivalents of NOBF<sub>4</sub> in a DCM:MeCN (v/v 1:1) solvent mixture. The reaction was monitored by <sup>31</sup>P{<sup>1</sup>H} NMR spectroscopy which showed the disappearance of the associated [PNNNP-PdI]<sup>+</sup> resonance at 73 ppm and appearance of a new resonance associated with [PNNNP-Pd-MeCN]<sup>+</sup> at 77 ppm. Minor resonances were observed at 75 ppm and 74 ppm consistent with partial iodination of the pyridyl backbone. Additionally, a minor resonance at 73 ppm consistent with [PNNNP-Pd-OH]<sup>+</sup> is observed owing to the presence of adventitious water.

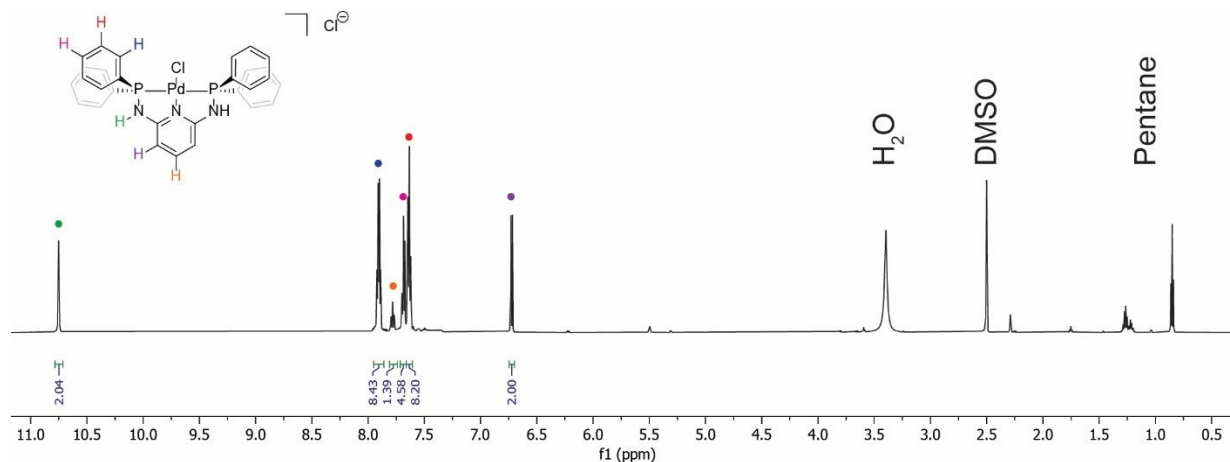

**Figure S35.** <sup>1</sup>H NMR spectrum (DMSO-d<sub>6</sub>) of [Ph<sub>4</sub>-PNNNP-PdCl]Cl

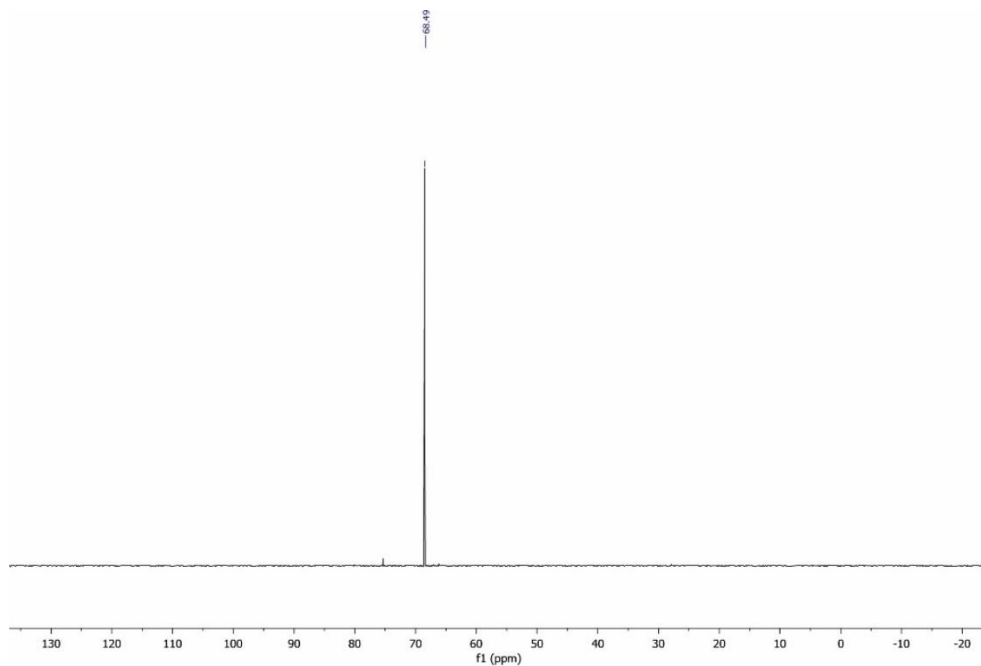

**Figure S36.**  $^{31}\text{P}\{^1\text{H}\}$  NMR spectrum ( $\text{DMSO-}d_6$ ) of  $[\text{Ph}_4\text{-P}^{\text{N}}\text{N}^{\text{N}}\text{P-PdCl}]\text{Cl}$

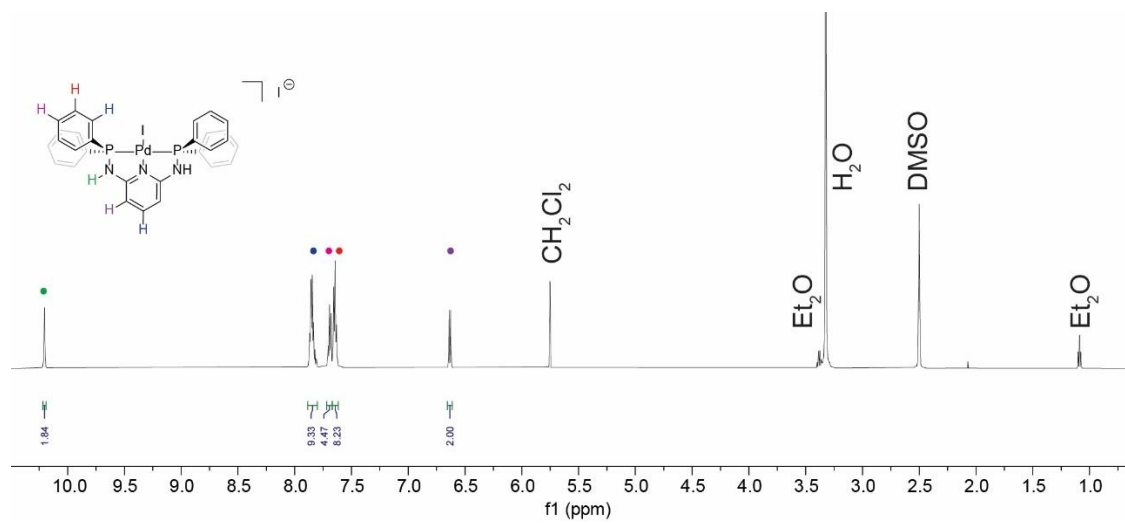

**Figure S37.**  $^1\text{H}$  NMR spectrum ( $\text{DMSO-}d_6$ ) of  $[\text{Ph}_4\text{-P}^{\text{N}}\text{N}^{\text{N}}\text{P-Pd}]\text{I}$



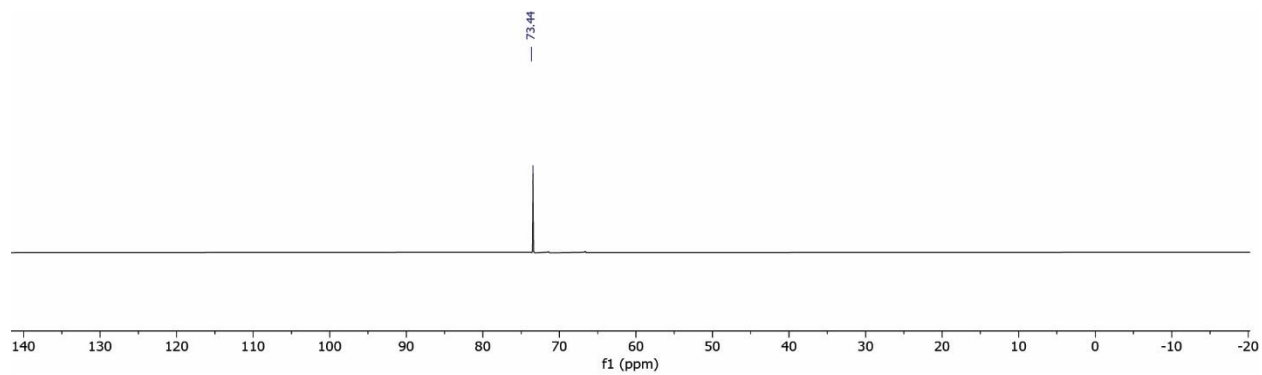

**Figure S38.** <sup>31</sup>P{<sup>1</sup>H} NMR spectrum (DMSO-d<sub>6</sub>) of [Ph<sub>4</sub>-P<sup>N</sup>N<sup>N</sup>P-Pd]

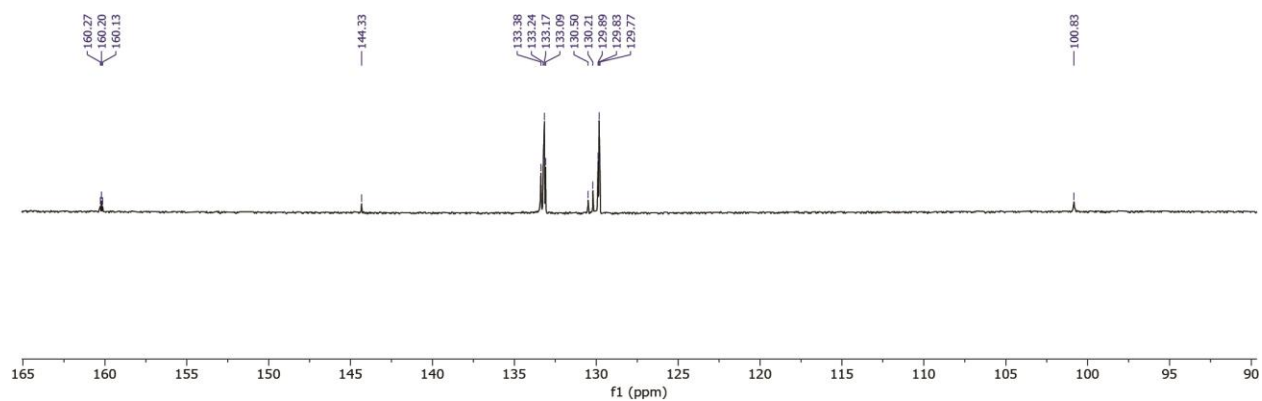

**Figure S39.** <sup>13</sup>C{<sup>1</sup>H} NMR spectrum (DMSO-d<sub>6</sub>) of [Ph<sub>4</sub>-P<sup>N</sup>N<sup>N</sup>P-Pd]

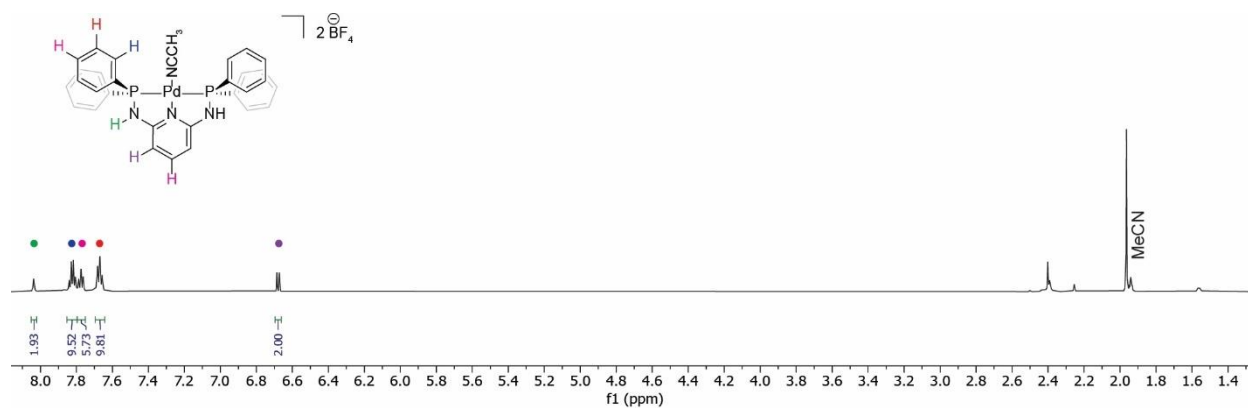

**Figure S40.** <sup>1</sup>H NMR spectrum (CD<sub>3</sub>CN) of [Ph<sub>4</sub>-P<sup>N</sup>N<sup>N</sup>P-Pd-MeCN][BF<sub>4</sub>]<sub>2</sub>

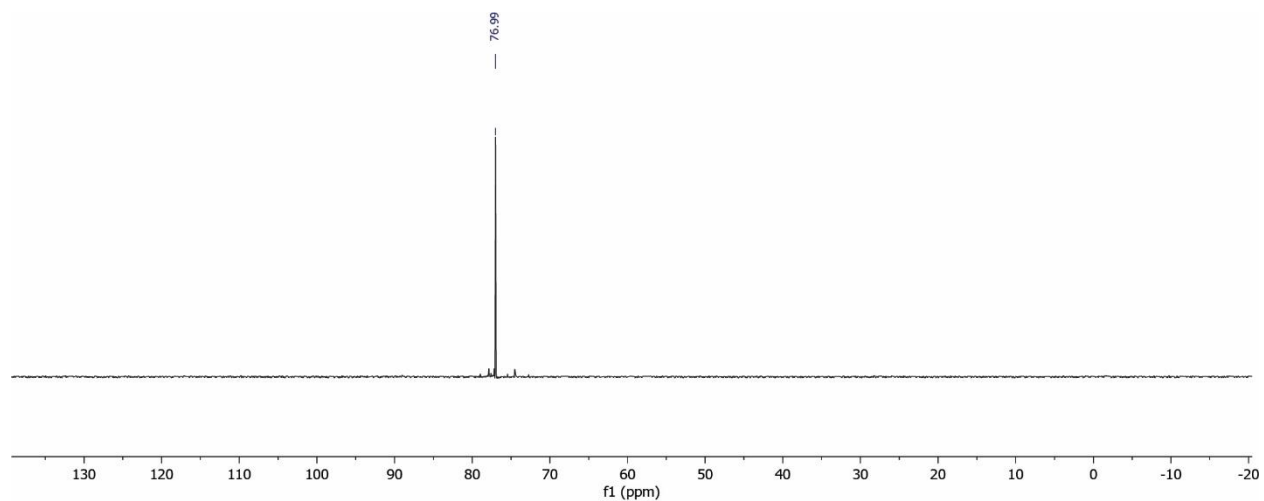

**Figure S41.**  $^{31}\text{P}\{^1\text{H}\}$  NMR spectrum ( $\text{CD}_3\text{CN}$ ) of  $[\text{Ph}_4\text{-P}^{\text{NNNP}}\text{-Pd-MeCN}][\text{BF}_4]_2$

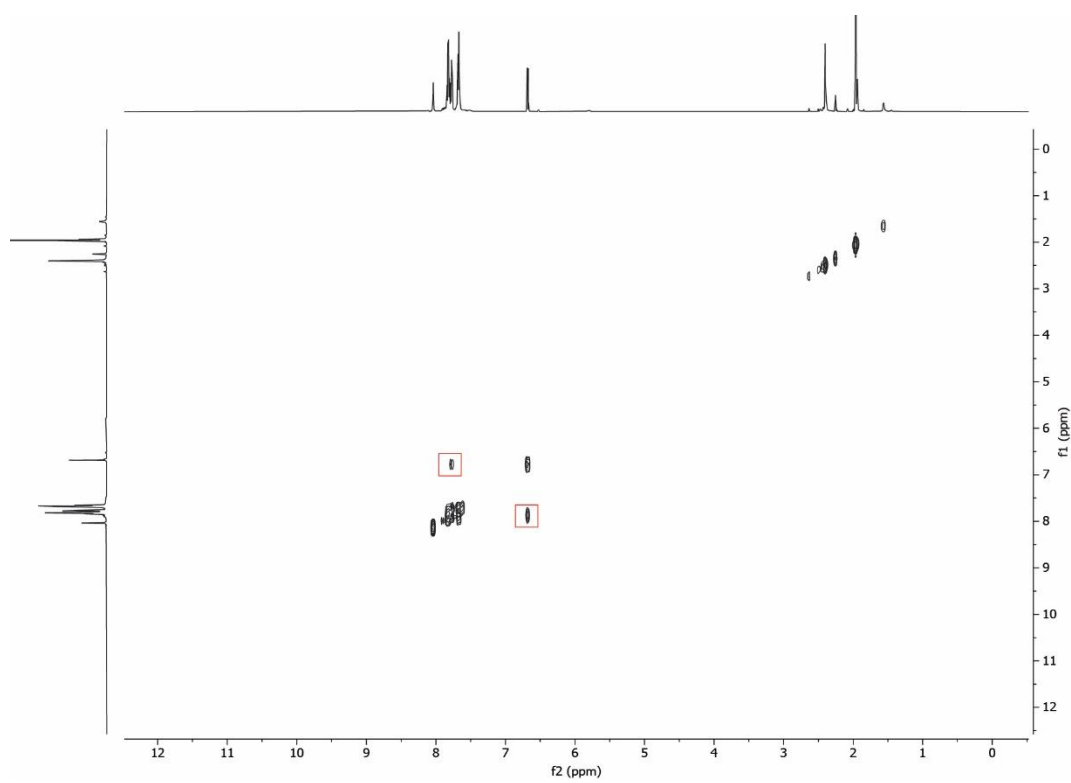

**Figure S42.**  $^1\text{H} - ^1\text{H}$  COSY spectrum ( $\text{CD}_3\text{CN}$ ) of  $[\text{Ph}_4\text{-P}^{\text{NNNP}}\text{-Pd-MeCN}][\text{BF}_4]_2$  with red boxes to indicate pyridine backbone cross peaks

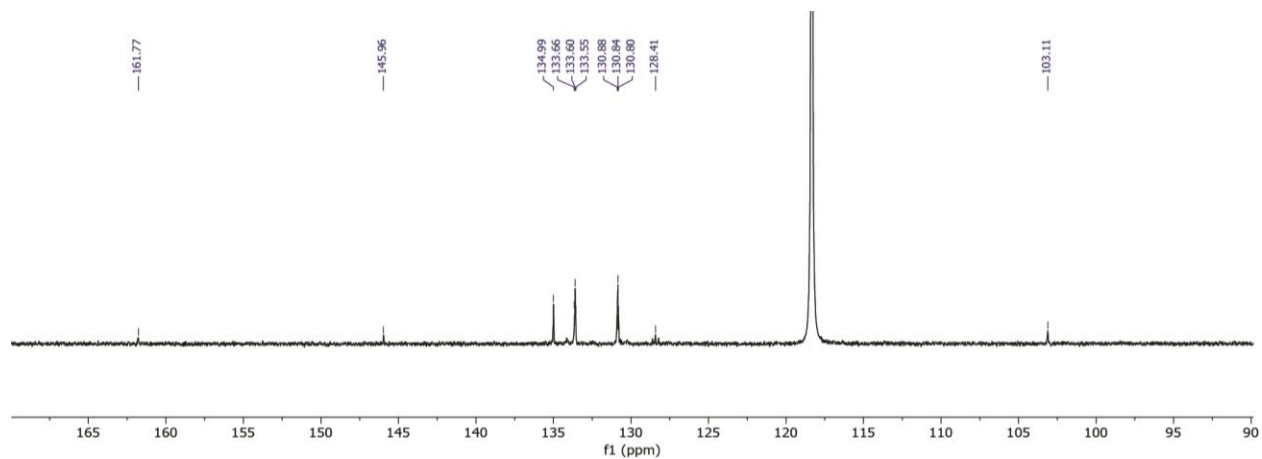

**Figure S43.**  $^{13}\text{C}\{^1\text{H}\}$  NMR spectrum ( $\text{CD}_3\text{CN}$ ) of  $[\text{Ph}_4\text{-P}^{\text{N}}\text{NP-Pd-MeCN}][\text{BF}_4]_2$

## References

- 1 A. Corma and M. Renz, *Chem. Commun.*, 2004, **4**, 550–551.
- 2 J. Jiang, F. Gándara, Y. B. Zhang, K. Na, O. M. Yaghi and W. G. Klemperer, *J. Am. Chem. Soc.*, 2014, **136**, 12844–12847.
- 3 M. Ermer, J. Mehler, B. Rosenberger, M. Fischer, P. S. Schulz and M. Hartmann, *ChemistryOpen*, 2021, **10**, 233–242.
- 4 F. Vermoortele, M. Vandichel, B. Van De Voorde, R. Ameloot, M. Waroquier, V. Van Speybroeck and D. E. De Vos, *Angew. Chem.Int. Ed.*, 2012, **51**, 4887–4890.
- 5 F. Vermoortele, B. Bueken, G. Le Bars, B. Van De Voorde, M. Vandichel, K. Houthoofd, A. Vimont, M. Daturi, M. Waroquier, V. Van Speybroeck, C. Kirschhock and D. E. De Vos, *J. Am. Chem. Soc.*, 2013, **135**, 11465–11468.
- 6 F. G. Cirujano and F. X. Llabrés I Xamena, *J. Phys. Chem. Lett.*, 2020, **11**, 4879–4890.
- 7 W.-L. Peng, F. Liu, X. Yi, S. Sun, H. Shi, Y. Hui, W. Chen, X. Yu, Z. Liu, Y. Qin, L. Song and A. Zheng, *J. Phys. Chem. Lett.*, 2022, **2**, 9295–9302.
- 8 F. G. Cirujano, F. X. Llabrés I Xamena and A. Corma, *Dalton Trans.*, 2012, **41**, 4249–4254.
- 9 A. M. Rasero-Almansa, M. Iglesias and F. Sánchez, *RSC Adv.*, 2016, **6**, 106790–106797.
- 10 L. Alaerts, E. Séguin, H. Poelman, F. Thibault-Starzyk, P. A. Jacobs and D. E. De Vos, *Chem. Eur. J.*, 2006, **12**, 7353–7363.
- 11 F. Vermoortele, R. Ameloot, L. Alaerts, R. Matthessen, B. Carlier, E. V. R. Fernandez, J. Gascon, F. Kapteijn and D. E. De Vos, *J. Mater. Chem.*, 2012, **22**, 10313–10321.
- 12 B. R. Reiner, A. A. Kassie and C. R. Wade, *Dalton Trans.*, 2019, **48**, 9588–9595.
